# Supplementary material for: PRedicting Outcomes For Crohn’s dIsease using a moLecular biomarkEr (PROFILE): protocol for a multicentre, randomised, biomarker-stratified trial
Source: PubMed Central journal article supplement (PMC6286485; doi:10.1136/bmjopen-2018-026767), 2018-12-05
Supplement: bmjopen-2018-026767.draft_revisions.pdf [file bmjopen-2018-026767.draft_revisions.pdf]

# BMJ Open

BMJ Open is committed to open peer review. As part of this commitment we make the peer review history of every article we publish publicly available.

When an article is published we post the peer reviewers' comments and the authors' responses online. We also post the versions of the paper that were used during peer review. These are the versions that the peer review comments apply to.

The versions of the paper that follow are the versions that were submitted during the peer review process. They are not the versions of record or the final published versions. They should not be cited or distributed as the published version of this manuscript.

BMJ Open is an open access journal and the full, final, typeset and author-corrected version of record of the manuscript is available on our site with no access controls, subscription charges or pay-per-view fees (<http://bmjopen.bmj.com>).

If you have any questions on BMJ Open's open peer review process please email [info.bmjopen@bmj.com](mailto:info.bmjopen@bmj.com)

# BMJ Open

## Predicting outcomes for Crohn's disease using a molecular biomarker (PROFILE): protocol for a multi-centre, randomised, biomarker-stratified trial

|                               |                                                                                                                                                                                                                                                                                                                                                                                                                                                                                                                                                                                                                                                                                                                                                                                                                                                                                                                                                                                                                                                                                                                    |
|-------------------------------|--------------------------------------------------------------------------------------------------------------------------------------------------------------------------------------------------------------------------------------------------------------------------------------------------------------------------------------------------------------------------------------------------------------------------------------------------------------------------------------------------------------------------------------------------------------------------------------------------------------------------------------------------------------------------------------------------------------------------------------------------------------------------------------------------------------------------------------------------------------------------------------------------------------------------------------------------------------------------------------------------------------------------------------------------------------------------------------------------------------------|
| Journal:                      | <i>BMJ Open</i>                                                                                                                                                                                                                                                                                                                                                                                                                                                                                                                                                                                                                                                                                                                                                                                                                                                                                                                                                                                                                                                                                                    |
| Manuscript ID                 | bmjopen-2018-026767                                                                                                                                                                                                                                                                                                                                                                                                                                                                                                                                                                                                                                                                                                                                                                                                                                                                                                                                                                                                                                                                                                |
| Article Type:                 | Protocol                                                                                                                                                                                                                                                                                                                                                                                                                                                                                                                                                                                                                                                                                                                                                                                                                                                                                                                                                                                                                                                                                                           |
| Date Submitted by the Author: | 19-Sep-2018                                                                                                                                                                                                                                                                                                                                                                                                                                                                                                                                                                                                                                                                                                                                                                                                                                                                                                                                                                                                                                                                                                        |
| Complete List of Authors:     | <p>Parkes, M; University of Cambridge, Department of Medicine<br/>         Noor, Nurulamin; University of Cambridge, Department of Medicine<br/>         Dowling, Francis; Cambridge Clinical Trials Unit<br/>         Leung, Harvey; Cambridge Clinical Trials Unit<br/>         Bond, Simon; Cambridge Clinical Trials Unit; MRC Biostatistics Unit<br/>         Whitehead, Lynne; Cambridge University Hospitals NHS Foundation Trust,<br/>         Clinical Trials Pharmacy<br/>         Upponi, Sara; Cambridge University Hospitals NHS Foundation Trust,<br/>         Department of Radiology<br/>         Kinnon, Paul; PredictImmune Ltd<br/>         Sandham, Andrew; PredictImmune Ltd<br/>         Lyons, Paul; University of Cambridge, Department of Medicine;<br/>         PredictImmune Ltd<br/>         McKinney, Eoin; University of Cambridge, Department of Medicine;<br/>         PredictImmune Ltd<br/>         Smith, Kenneth; University of Cambridge, Department of Medicine;<br/>         PredictImmune Ltd<br/>         Lee, James; University of Cambridge, Department of Medicine</p> |
| Keywords:                     | GENETICS, Inflammatory bowel disease < GASTROENTEROLOGY, Immunology < BASIC SCIENCES, Gastroenterology < INTERNAL MEDICINE, Clinical trials < THERAPEUTICS                                                                                                                                                                                                                                                                                                                                                                                                                                                                                                                                                                                                                                                                                                                                                                                                                                                                                                                                                         |
|                               |                                                                                                                                                                                                                                                                                                                                                                                                                                                                                                                                                                                                                                                                                                                                                                                                                                                                                                                                                                                                                                                                                                                    |

SCHOLARONE™  
Manuscripts

1  
2  
3  
4 Predicting outcomes for Crohn's disease using a  
5 molecular biomarker (PROFILE): protocol for a multi-  
6 centre, randomised, biomarker-stratified trial  
7  
8  
9

10  
11 **Authors**

12  
13 Miles Parkes<sup>1\*†</sup>, Nurulamin M Noor<sup>1\*</sup>, Francis Dowling<sup>2</sup>, Harvey Leung<sup>2</sup>,  
14 Simon Bond<sup>2,3</sup>, Lynne Whitehead<sup>4</sup>, Sara Upponi<sup>5</sup>, Paul Kinnon<sup>6</sup>, Andrew P  
15 Sandham<sup>6</sup>, Paul A Lyons<sup>1,6</sup>, Eoin F McKinney<sup>1,6</sup>, Kenneth GC Smith<sup>1,6</sup>, James  
16 C Lee<sup>1†</sup>  
17

- 18  
19 1. Department of Medicine, University of Cambridge School of Clinical  
20 Medicine, Addenbrooke's Hospital, Cambridge, United Kingdom.  
21  
22 2. Cambridge Clinical Trials Unit, Coton House, Level 6, Cambridge  
23 University Hospitals NHS Foundation Trust, Cambridge, United Kingdom.  
24  
25 3. Medical Research Council Biostatistics Unit, Forvie Site, Robinson Way,  
26 Cambridge, United Kingdom.  
27  
28 4. Clinical Trials Pharmacy, Addenbrooke's Hospital, Cambridge, United  
29 Kingdom.  
30  
31 5. Department of Radiology, Addenbrooke's Hospital, Cambridge, United  
32 Kingdom.  
33  
34 6. PredictImmune Ltd., Maia Building 270, Babraham Research Campus,  
35 Cambridge, United Kingdom.  
36  
37  
38  
39  
40

41 \* These authors contributed equally

42 † Corresponding authors (MP: [miles.parkes@addenbrookes.nhs.uk](mailto:miles.parkes@addenbrookes.nhs.uk), JCL:  
43 [jcl65@cam.ac.uk](mailto:jcl65@cam.ac.uk))  
44  
45  
46  
47  
48  
49  
50  
51  
52  
53  
54  
55  
56  
57  
58  
59  
60

## ABSTRACT

### Background

The course of Crohn's disease (CD) varies substantially between individuals, but reliable prognostic markers do not exist. This hinders disease management because patients with aggressive disease are undertreated by conventional "Step-Up" therapy (in which treatment is gradually escalated in response to refractory or relapsing disease) while those with more indolent disease would be exposed to unnecessary treatment-related toxicity if a more aggressive "Top-Down" approach were indiscriminately used. PROFILE will assess whether a prognostic transcriptional biomarker, that we have developed and validated, can improve clinical outcomes by facilitating personalized therapy in CD. This represents the first the biomarker-stratified trial in inflammatory bowel disease.

### Methods and analysis

This biomarker-stratified trial will compare the relative efficacy of "Top-Down" and "Accelerated Step-Up" therapy between biomarker-defined subgroups of patients with newly-diagnosed CD. 400 participants from ~50 UK centres will be recruited. Subjects within each biomarker subgroup (IBD<sup>hi</sup> or IBD<sup>lo</sup>) will be randomised (1:1) to receive one of the treatment strategies until trial completion (48 weeks). The primary outcome is the incidence of sustained surgery and steroid-free remission from completion of induction treatment through to week 48. Secondary outcomes include mucosal healing, quality of life assessments, and surrogate measures of disease burden including number of flares, cumulative steroid exposure, number of hospital admissions and number of Crohn's-related surgeries (assessed hierarchically). Analyses will compare the relative benefit of the treatment strategies in each biomarker-defined subgroup, powered as an interaction analysis, to determine whether the biomarker can accurately match patients to the most appropriate therapy.

### Ethics and dissemination

Ethical approval has been obtained and recruitment is underway at sites around the United Kingdom. Following trial completion and data analysis, the

1  
2  
3 results of the trial will be submitted for publication in peer-reviewed journals  
4 and presented at international conferences.  
5  
6

7 **Trial registration details:** ISRCTN: 11808228 (registered 3/11/2017).  
8  
9

10 [297/300]  
11  
12  
13

14 **Keywords**

15 Crohn's disease, trial, biomarker, personalised medicine, stratified  
16  
17  
18  
19  
20  
21  
22  
23  
24  
25  
26  
27  
28  
29  
30  
31  
32  
33  
34  
35  
36  
37  
38  
39  
40  
41  
42  
43  
44  
45  
46  
47  
48  
49  
50  
51  
52  
53  
54  
55  
56  
57  
58  
59  
60

## Article Summary

### Strengths and limitations of this study

- The first biomarker-stratified trial in inflammatory bowel disease, using a blood-based gene expression assay to stratify newly diagnosed Crohn's disease patients into subgroups (IBD<sup>hi</sup> or IBD<sup>lo</sup>) that have been shown to correlate with disease prognosis.
- A multi-centre, randomised trial of 400 patients across approximately 50 sites, comparing "Top-Down" versus "Accelerated Step-Up" treatment approaches in each biomarker-defined subgroup.
- The largest interventional trial ever conducted in adult patients with newly-diagnosed Crohn's disease.
- Pragmatic trial design with wide eligibility criteria, although patient population currently limited to the United Kingdom.
- Findings have the potential to demonstrate that personalised therapy can be effectively delivered to patients with Crohn's disease at the time of diagnosis.

## Introduction

Crohn's disease (CD) is a relapsing-remitting form of inflammatory bowel disease (IBD) that can affect any part of the intestine, most commonly the ileum and/or colon. It is a common condition, affecting ~1 in 400-500 people in Northwestern Europe and North America, with a steadily rising global incidence.[1,2]

Like many other immune-mediated diseases, the course of CD varies substantially between affected individuals, but no reliable prognostic markers currently exist. The most common treatment strategy in CD is therefore based on a reactive, step-wise escalation in therapy that occurs in response to recurrent flares or persistently active disease. This approach (termed "Step-Up") should not over-treat patients but will inevitably expose some individuals to cumulative intestinal damage and disease-related complications while therapies that are insufficiently potent for them are trialled.

In 2008, it was shown that early use of anti-TNF $\alpha$  monoclonal antibodies (anti-TNF $\alpha$  therapy) was superior to conventional "Step-Up" management.[3] Further support for early anti-TNF $\alpha$  use came from registration trials, which demonstrated greater efficacy of anti-TNF $\alpha$  therapy when it was used earlier in the disease course;[4,5] and the SONIC trial, which showed that combining anti-TNF $\alpha$  (Infliximab) with Azathioprine (termed combination or "Top-Down" therapy) achieved results superior to either alone.[6] However, it is widely recognised that the indiscriminate use of combination therapy in all patients would expose those patients destined for mild disease to the risks and side-effects of treatment that their disease did not require, and would also be economically unfeasible.

In an attempt to reconcile these issues, subsequent trials have sought to identify approaches that could still deliver relatively early, aggressive therapy but also be economically feasible. The REACT trial, for example, investigated whether accelerating more quickly up the treatment ladder ("Accelerated Step-Up") would lead to better outcomes.[7] Similarly, the AZTEC and RAPID trials investigated whether initiating Azathioprine, a less potent but cheaper

1  
2  
3 immunomodulator, in all patients at diagnosis would improve outcomes.[8,9]  
4 However, none of these studies have demonstrated improved efficacy over  
5 standard care, leading many to conclude that a "precision" (or "personalised")  
6 approach would be required in which the most potent treatments are targeted  
7 to those who need them. Unfortunately, despite investigation into the  
8 prognostic utility of clinical, genetic and serological markers, there remain no  
9 well-validated prognostic tools for CD that can reliably predict the disease  
10 course from diagnosis. Indeed, a recent priority setting partnership group,  
11 tasked with identifying major areas of unmet need in IBD research,  
12 designated the need to develop markers to guide treatment for individual  
13 patients as the most important unmet need in IBD.[10] Consistent with this, a  
14 survey of 52 US and 50 UK gastroenterologists (commissioned through Apex  
15 Healthcare Consulting) showed that nearly all gastroenterologists recognised  
16 a need for an assay that could predict the clinical outcome and probability of  
17 relapse in CD (UK 98%, US 94%; Table 1). Moreover, if the results of such a  
18 biomarker enabled gastroenterologists to amend their treatment approach, all  
19 of the respondents would use the test in their practice (Table 1).  
20  
21  
22  
23  
24  
25  
26  
27  
28  
29  
30

31  
32 Our group has previously identified a gene expression signature in peripheral  
33 blood CD8+ T cells from patients with active, untreated IBD (and other  
34 autoimmune diseases) that is related to T cell exhaustion and which  
35 correlates with subsequent prognosis.[11–13] Patients in the IBD1 subgroup,  
36 defined by this signature, had a much more aggressive disease than those in  
37 the IBD2 subgroup, with earlier recurrence of disease and more flares over  
38 time.[11] To help translate this to routine clinical practice, we have since  
39 developed a whole blood qPCR assay that can identify patient subgroups  
40 which are analogous to those identified by the CD8 signature, but which does  
41 not require cell separation (manuscript in preparation). This assay has been  
42 independently prospectively validated in a cohort of 84 IBD patients from four  
43 centres around the UK.[14] We now propose to conduct a biomarker-stratified  
44 trial to determine whether this biomarker can facilitate the delivery of  
45 personalised medicine in CD and improve outcomes.  
46  
47  
48  
49  
50  
51  
52  
53  
54  
55

56 This manuscript summarises the approved PROFILE trial protocol that is in  
57



1  
2  
3 use at the time of publication (version 3.0, 30<sup>th</sup> April 2018). The full version of  
4 the protocol is available at:

5  
6 <http://www.crohnsprofiletrial.com/index.php/investigators/downloads/>.

7  
8  
9 The PROFILE trial participant information sheet (PIS) that is in use at the time  
10 of publication (version 3.1, 25<sup>th</sup> June 2018) is available at:

11  
12 <http://www.crohnsprofiletrial.com/index.php/participants/downloads/>.

13  
14  
15 Any future amendments to this protocol or participant information sheet will  
16 require agreement with the Sponsors and amendments will only be initiated  
17 following approval with the Sponsors and amendments will only be initiated  
18 following approval by a Research Ethics Committee (REC).  
19  
20  
21  
22  
23  
24  
25  
26  
27  
28  
29  
30  
31  
32  
33  
34  
35  
36  
37  
38  
39  
40  
41  
42  
43  
44  
45  
46  
47  
48  
49  
50  
51  
52  
53  
54  
55  
56  
57  
58  
59  
60

|                                                                                                                                            | UK (n = 50)      | US (n = 52)      |
|--------------------------------------------------------------------------------------------------------------------------------------------|------------------|------------------|
| "CD patients are at moderate-to-high risk of relapse throughout their lives"                                                               | Agree – 80% (40) | Agree – 79% (41) |
| "There is a need for an assay that would predict clinical outcome and probability of relapse in CD"                                        | Agree - 98% (49) | Agree - 94% (49) |
| Would you use a test to predict clinical outcome and probability of relapse even if you could not change your treatment approach?          | Yes – 58% (29)   | Yes – 54% (28)   |
| Would you use a test to predict clinical outcome and probability of relapse if it enabled you to alter your treatment approach?            | Yes – 100% (50)  | Yes – 100% (52)  |
| How many days following a test to predict clinical outcome and probability of relapse would you require the results for this to be useful? | 10 days (mean)   | 9 days (mean)    |

**Table 1. Summary results of an independent 2015 survey of practising gastroenterologists performed by Apex Healthcare Consulting**

Gastroenterologists: Clinically active attending physicians (US) or consultants (UK) with 5-30 years specialty experience, including inflammatory bowel disease caseload. Survey funded by Wellcome Trust (Interim Translational Award 099450/Z/12/Z)

## **Aims and objectives**

The PROFILE trial will test whether stratification using a whole blood gene expression biomarker can facilitate personalised therapy in CD and improve clinical outcomes. The hypothesis is that the biomarker will identify individuals destined to run an aggressive, relapsing course, and that in these individuals a greater benefit of early “Top-Down” therapy will be observed. Similarly, we hypothesise that the biomarker will reliably identify those patients destined to experience more indolent disease, who can be effectively managed using conventional “Accelerated Step-Up” approaches without the risks and side-effects of unnecessary immunosuppression.

In addition, the trial will seek to advance scientific understanding of CD through the collection of a range of biological samples for future exploratory translational and scientific studies. These will include microbial, metabolomic, proteomic, genetic and transcriptomic samples.

## **Methods and analysis**

### *Trial design and flowchart*

The trial is designed as a randomised, biomarker-stratified trial to assess the relative benefit of different treatment approaches in biomarker-defined subgroups. This is an established design for the validation of predictive biomarkers,[15] and has been used widely in the setting of oncology trials.[16] Within each biomarker group, patients will be randomised in a 1:1 ratio to receive either “Top-Down” or Accelerated Step-Up” therapy (Figure 1).

### *Trial sites*

PROFILE is a multi-centre trial based in National Health Service hospitals within the UK. This trial aims to recruit 400 participants with newly diagnosed CD and will be conducted in approximately 50 sites (<http://www.crohnsprofiletrial.com/index.php/investigators/>).

### *Trial duration*

After providing informed consent, participants will be enrolled within the trial for 48 weeks following the baseline visit. There will be a total of 6 mandatory

1  
2  
3 trial visits, during which data will be collected. These will take place at the  
4 same timepoints for all participants and have been timed to coincide with  
5  
6  
7  
8  
9  
10  
11  
12  
13  
14  
15  
16  
17  
18  
19  
20  
21  
22  
23  
24  
25  
26  
27  
28  
29  
30  
31  
32  
33  
34  
35  
36  
37  
38  
39  
40  
41  
42  
43  
44  
45  
46  
47  
48  
49  
50  
51  
52  
53  
54  
55  
56  
57  
58  
59  
60

trial visits, during which data will be collected. These will take place at the same timepoints for all participants and have been timed to coincide with Infliximab infusion visits where possible (for those receiving “Top-Down” therapy). The end of the trial will be the last participant’s last visit.

### *Eligibility criteria*

Patients will be considered eligible for enrolment if they fulfil all of the inclusion criteria and meet none of the exclusion criteria (Box 1). The target population are patients with newly diagnosed, active CD who are immunomodulator and anti-TNF $\alpha$  treatment naïve.

### *Patient and Public Involvement*

The development and advancement of personalised medicine in CD represents a major goal for both patients and physicians, and was recently named one of the key research priorities in IBD by a priority setting partnership group, which included both patients and other key stakeholders.[10]

A local panel of CD patients at Cambridge University Hospitals NHS Trust was actively involved in the design of the study and development of study documentation, and feedback was also obtained by a broader panel of non-IBD patients convened by the Cambridge Clinical Trials Unit. Patient support groups (Crohn's and Colitis UK) were engaged during the conduct of the trial via invitation to investigator meetings, presentation to patient support groups, and publicity of the trial on their website and social media platforms. Both Crohn's and Colitis UK and trial participants have also contributed to the content of the trial website

(<http://www.crohnsprofiletrial.com/index.php/participants>), although patients were not directly involved in the recruitment to, or conduct of, the trial.

Following trial completion and reporting, results of the trial will be disseminated in an easy-to-understand format to all trial participants and to Crohn's and Colitis UK, as well to the general public via press releases and the public engagement team at the University of Cambridge.

**Box 1 – Eligibility criteria for the PROFILE trial****Inclusion criteria**

Subjects meeting all of the criteria below may be included in the trial:

- CD diagnosed within 3 months using standard endoscopic, histologic or radiological criteria\*.
- Clinical evidence of active CD (corresponding to Harvey Bradshaw Index  $\geq$  7).
- Endoscopic evidence of at least moderately active CD (corresponding to SES-CD  $> 6$  or  $> 4$  if limited to the terminal ileum).
- C-reactive protein (CRP)  $>$  upper limit of normal on local assay or faecal calprotectin  $> 200 \mu\text{g/g}$ .
- Immunomodulator and anti-TNF $\alpha$  treatment naïve\*\*.
- Aged 16-80 years old.

\* Newly-diagnosed patchy colonic inflammation, initially diagnosed as indeterminate colitis, would meet inclusion criteria if clinical impression consistent with CD.

\*\* Patients need to have discontinued systemic corticosteroids for one week or more prior to screening assessments and still have ongoing, active disease.

**Exclusion criteria**

The presence of any of the following would preclude patient inclusion:

- Patients with ulcerative colitis.
- Patients with fistulating peri-anal CD or active perianal sepsis.
- Patients with obstructive symptoms and evidence of a fixed stricture on radiology or colonoscopy, which suggest that the subject is at high risk of requiring surgery over the following year.
- Patients with contra-indications to trial medications.
- Patients who are pregnant or breastfeeding at baseline.
- Other serious medical or psychiatric illness currently ongoing, or experienced in the last 3 months, that could compromise the trial.
- Patients unable to comply with protocol requirements (for reasons including alcohol and/or recreational drug abuse).

## *Outcome measures*

### Primary outcome

Incidence of sustained surgery and steroid-free remission from completion of induction treatment (a standard, 8 week course of oral steroids) through to week 48.\*

\*remission = Harvey-Bradshaw Index (HBI)  $\leq 4$ . Requirement for a course of systemic glucocorticoids for active CD would result in failure to meet the primary outcome measure.

### Secondary outcomes

1. Mucosal healing (assessed using simplified endoscopic score in CD [SES-CD])
2. Quality of life assessment (assessed using Inflammatory Bowel Disease Questionnaire [IBD-Q])
3. Assessment of cumulative disease burden based on:
  - i. Number of flares by 1 year.
  - ii. Cumulative glucocorticoid exposure by 1 year.
  - iii. Steroid-free remission by 1 year.
  - iv. Number of hospital admissions and CD surgeries by 1 year.

### *Health economic evaluation*

During the course of the trial there will be a local health economic analysis conducted by the Cambridge Centre for Health Services Research, as well as a national health economic analysis conducted by the National Institute for Health and Clinical Excellence (NICE). The findings of these health economic analyses will be disseminated alongside clinical trial findings.

### *Treatment assignment*

All patients considered eligible for the trial at the screening visit will have an 8 week reducing course of Prednisolone initiated for treatment of their active luminal Crohn's disease following screening assessments. Each will be assigned a unique participant ID number, for which a biomarker result will be returned. Anonymised data on all participants who are approached will be

1  
2  
3 collated in accordance with Consolidated Standards of Reporting Trials  
4 (CONSORT) guidelines. Following biomarker assessment, participants in  
5 each biomarker subgroup will be randomly assigned (1:1) to either "Top-  
6 Down" or "Accelerated Step-Up" therapy, using a computer-generated  
7 algorithm (Figure 1). This will occur within 14 days of screening (plus or minus  
8 5 days).  
9  
10  
11  
12  
13

14 As the trial is testing the ability of the biomarker to stratify therapy, rather than  
15 the efficacy of the individual medications (which are established treatments for  
16 CD), PROFILE has been designated a non-CTIMP trial (i.e. not a Clinical Trial  
17 of Investigational Medicine Product). All treatments will be open-label, but  
18 clinicians and participants will be blinded to biomarker subgroup designation.  
19  
20  
21  
22  
23

#### 24 *Treatment arms*

25 Following induction treatment with Prednisolone, patients will follow the  
26 treatment strategy to which they are randomised. These are:  
27  
28  
29

#### 30 "Accelerated Step-Up" therapy

- 31  
32 • Flare 1 (after induction therapy or if disease re-flares during induction  
33 therapy): Commence Azathioprine (2.5 mg/kg) OR low dose 6-  
34 Mercaptopurine with Allopurinol (if mild intolerance to azathioprine) OR  
35 Methotrexate (if severe intolerance to thiopurines or thiopurine  
36 methyltransferase [TPMT] null) together with a 12-week reducing  
37 course of Prednisolone.  
38
- 39 • Flare 2: Commence Infliximab. If sub-optimal response, then for  
40 Infliximab dose-escalation as outlined in the full trial protocol.  
41
- 42 • Flare 3+ (i.e. disease flare after Infliximab dose optimisation): 8 week  
43 reducing course of Prednisolone.  
44  
45  
46  
47  
48  
49

#### 50 "Top-Down" therapy

- 51  
52 • Infliximab started 2 weeks after randomisation with Azathioprine  
53 (2.5mg/kg) or alternative immunomodulator as described above. If sub-  
54 optimal response, then for Infliximab dose-escalation as described in  
55  
56  
57  
58  
59  
60

1  
2  
3 the full trial protocol. The rate of weaning of Prednisolone should be  
4 accelerated once Infliximab is commenced to 10mg/week.  
5

- 6 • Subsequent disease flares (i.e. disease flare after Infliximab dose  
7 optimisation): 8 week reducing course of Prednisolone.  
8  
9

10  
11 Participants with persistent non-response to Infliximab can have early  
12 treatment termination and revert back to standard care, at the discretion of  
13 their local clinical team.  
14  
15

### 16 17 *Trial procedures & assessments*

18  
19 Newly-diagnosed patients with CD will be recruited from a predominantly  
20 outpatient setting. Potential trial patients will be identified by local clinical team  
21 members and be given a PIS prior to attending a screening visit. All  
22 participants must have had a colonoscopy before screening, where possible  
23 recorded for central reading. A Magnetic Resonance Enterography (MRE) to  
24 stage disease in accordance with European consensus guidelines[17] is also  
25 required but can be performed after trial entry.  
26  
27  
28  
29  
30  
31

32 Assessments, data collection and obtaining informed consent will be  
33 performed by appropriately trained research staff, as delegated by the  
34 Principal Investigator at each site. At trial visits, clinical data will be collected  
35 as well as samples for local and central processing – collection, evaluation  
36 and storage of these samples is outlined in the full trial protocol. Participants  
37 receiving Infliximab should have infusion visits aligned with trial visits, as  
38 shown in Figure 2, to reduce visit burden and the placebo effect associated  
39 with extra visits.[18] Following their final trial visit, participants will return to  
40 normal standard of care, according to local clinical practice.  
41  
42  
43  
44  
45  
46  
47

48 Only adverse events (AEs) that relate to CD, drug therapy for CD (sufficiently  
49 severe to require a change of treatment), or the biomarker sample collection  
50 will be recorded and assessed. Safety reporting and assessment of causality  
51 and expectedness of serious AEs (SAEs) will occur within standard timelines.  
52  
53 The trial sponsors will arrange insurance for negligent harm caused as a  
54 result of protocol design and for non-negligent harm arising through  
55  
56  
57  
58



1  
2  
3 participation in the clinical trial.  
4  
5

### 6 *Sample size calculation*

7 We will recruit 400 participants into the PROFILE trial. This sample size was  
8 determined using a power calculation in which power was calculated by  
9 simulating 10,000 study designs and counting how many times a significant  
10 result was obtained. This was based on previously published remission rates  
11 for the primary endpoint,[3,7] the observed ratio of the IBD<sup>hi</sup>/IBD<sup>lo</sup> biomarker  
12 result in existing cohorts (1:1), and the observed remission rates in each of  
13 these cohorts.[14]  
14  
15  
16  
17  
18

### 19 *Statistical procedures and data analysis plan*

20 The primary analysis is powered as an interaction analysis, where the  
21 interaction refers to the difference between the relative benefit of "Top-Down"  
22 over "Accelerated Step-Up" in each subgroup. This analytical strategy  
23 maximises the information available from each subgroup, and will determine  
24 whether the biomarker can accurately match patients to the most appropriate  
25 treatment strategy. Assuming an interaction of 0.3, a sample size of 346 will  
26 provide 90% power (estimated with 95% confidence intervals and tested at a  
27 2-tailed, 5% significance level). To allow for a ~13.5% drop out rate, 400  
28 participants will be recruited across approximately 50 sites. This will require  
29 recruitment of ~4 participants per site per year, which is a rate consistent with  
30 previous recruitment to Investigator-led IBD studies in the UK.[19]  
31 Recruitment began in December 2017.  
32  
33  
34  
35  
36  
37  
38  
39  
40  
41  
42

43 To control for multiple testing, we will perform a closed testing procedure over  
44 the primary and 6 secondary endpoints, testing the biomarker-treatment  
45 interaction. A well-described methodology combining gate-keeping and Holm-  
46 Bonferroni methods in formal hypothesis testing will be used,[20] as outlined  
47 in Supplementary Figure 1. The secondary outcome measures will include an  
48 endoscopic assessment of mucosal healing (in addition to further analyses  
49 using MRE data), a quality of life assessment and a third outcome measure  
50 related to overall burden of disease (this hierarchically includes number of  
51 flares, cumulative steroid exposure, number of hospital admissions and  
52  
53  
54  
55  
56  
57  
58  
59  
60

1  
2  
3 number of Crohn's-related surgeries).  
4  
5

6 Mucosal healing has been associated with improved long-term outcomes in  
7 CD.[21,22] The use of central reading, in which the endoscopic images or  
8 video recordings are externally evaluated, has been further associated with a  
9 reduction in placebo response rates,[23] in part due to more stringent  
10 application of inclusion criteria and assessment of endoscopic response.[24]  
11 The PROFILE trial will utilise video recording of colonoscopy at the end of the  
12 trial period in all patients and at the outset in as many patients as possible,  
13 using the SES-CD,[25] a scoring tool that has been shown to have high inter-  
14 and intra-rater reliability.[26] To date, many trials using endoscopic endpoints  
15 have applied *post-hoc* analyses in small cohorts, resulting in limited power to  
16 detect effects.[27] In this respect, the PROFILE trial will be one of the largest  
17 trials to analyse mucosal healing routinely and the first to do so in the setting  
18 of adults with CD treated with "Top-Down" therapy from diagnosis.  
19  
20  
21  
22  
23  
24  
25  
26  
27

28  
29 An MRE will be performed at the end of the trial period in all patients. There is  
30 increasing interest in the use of MRE as a measure of disease activity in  
31 clinical trials, with the development of imaging scores such as the Magnetic  
32 Resonance Index of Activity (MaRIA).[28,29] This, and other similar scores,  
33 have often been validated and refined in relatively small cohorts [30] and none  
34 are in routine clinical use. With 400 participants, the PROFILE trial will enable  
35 further evaluation of the MaRIA score both in terms of confirming treatment  
36 response and as an evaluative index.[31]  
37  
38  
39  
40  
41  
42

43 Quality of life assessments will be performed over repeated visits and will be  
44 analysed using a mixed effect repeat measure analysis with a clustered  
45 patient-level residual error with unstructured covariance over visits, fixed  
46 effects for visit, and all other covariates assumed to have a constant fixed  
47 effect over time.  
48  
49  
50  
51

52  
53 It is anticipated that future data collection will also take place following  
54 completion of treatment to assess disease burden and the longer-term impact  
55  
56  
57

1  
2  
3 of “Top-Down” vs. “Accelerated Step-Up” treatment approaches on  
4 subsequent disease course for these patients.  
5  
6  
7

## 8 **Conclusions**

9 Currently there is a clear unmet need in the management of IBD, in that  
10 treatment strategies – whatever they may be – are typically applied in a one-  
11 size-fits-all manner or using “prognostic” markers that have not been shown to  
12 be able to guide therapy.  
13  
14  
15

16  
17 The PROFILE trial is the first biomarker-stratified trial in IBD and will  
18 investigate whether a blood-based biomarker, assessed at diagnosis, can  
19 stratify patients with CD to receive therapy that is appropriately matched to  
20 their subsequent disease course.  
21  
22  
23

24  
25 If stratification by IBD<sup>hi</sup>/IBD<sup>lo</sup> status is demonstrated to improve clinical  
26 outcomes by appropriately identifying those patients who require “Top-Down”  
27 therapy and those who can be safely managed with “Accelerated Step-Up”  
28 therapy, this would represent a step-change in the management of CD and  
29 would help make personalised medicine a reality for patients.  
30  
31  
32  
33

## 34 **Ethics and dissemination**

35  
36 The trial protocol was approved by the East of England - Cambridge South  
37 Research Ethics Committee (Ref: 17/EE/03/82). Recruitment for the PROFILE  
38 trial began in December 2017 and is currently ongoing at sites around the  
39 United Kingdom. On completion of the trial, the data will be analysed and  
40 tabulated and a final trial report prepared. Following trial completion and  
41 analysis, the results will be presented at scientific meetings and submitted for  
42 publication in a peer-reviewed journal. Press releases will be prepared to  
43 accompany publication of this trial in order to share the results more widely  
44 with the global medical community, trial participants and patient support  
45 groups. Reasonable applications for individual clinical trial participant-level  
46 data will be considered by the trial team and shared on a controlled access  
47 basis if approved. Authorship of final trial outputs will be assigned in  
48  
49  
50  
51  
52  
53  
54  
55  
56  
57  
58  
59  
60

1  
2  
3 accordance with guidelines set out by the International Committee of Medical  
4 Journal Editors. The SPIRIT reporting guidelines have been used in  
5 preparation of this article.[32]  
6  
7  
8  
9  
10  
11  
12  
13  
14  
15  
16  
17  
18  
19  
20  
21  
22  
23  
24  
25  
26  
27  
28  
29  
30  
31  
32  
33  
34  
35  
36  
37  
38  
39  
40  
41  
42  
43  
44  
45  
46  
47  
48  
49  
50  
51  
52  
53  
54  
55  
56  
57  
58  
59  
60

For peer review only

## References

- 1 Kaplan GG, Ng SC. Understanding and Preventing the Global Increase of Inflammatory Bowel Disease. *Gastroenterology* 2017;**152**:313–321.e2. doi:10.1053/j.gastro.2016.10.020
- 2 Ng SC, Shi HY, Hamidi N, *et al.* Worldwide incidence and prevalence of inflammatory bowel disease in the 21st century: a systematic review of population-based studies. *Lancet* 2017;**390**:2769–78. doi:10.1016/S0140-6736(17)32448-0
- 3 D’Haens G, Baert F, van Assche G, *et al.* Early combined immunosuppression or conventional management in patients with newly diagnosed Crohn’s disease: an open randomised trial. *Lancet* 2008;**371**:660–7. doi:10.1016/S0140-6736(08)60304-9
- 4 Schreiber S, Reinisch W, Colombel JF, *et al.* Subgroup analysis of the placebo-controlled CHARM trial: Increased remission rates through 3years for adalimumab-treated patients with early Crohn’s disease. *J Crohn’s Colitis* 2013;**7**:213–21. doi:10.1016/j.crohns.2012.05.015
- 5 Hanauer SB, Feagan BG, Lichtenstein GR, *et al.* Maintenance infliximab for Crohn’s disease: The ACCENT I randomised trial. *Lancet* 2002;**359**:1541–9. doi:10.1016/S0140-6736(02)08512-4
- 6 Colombel JF, Sandborn WJ, Reinisch W, *et al.* Infliximab, azathioprine, or combination therapy for Crohn’s disease. *N Engl J Med* 2010;**362**:1383–95. doi:10.1056/NEJMoa0904492
- 7 Khanna R, Bressler B, Levesque BG, *et al.* Early combined immunosuppression for the management of Crohn’s disease (REACT): A cluster randomised controlled trial. *Lancet* 2015;**386**:1825–34. doi:10.1016/S0140-6736(15)00068-9
- 8 Sans M, Román AL, Esteve M, *et al.* Early Use of Azathioprine Has a Steroid Sparing Effect on Recently Diagnosed Crohn’s Disease Patients. *Gastroenterology* 2011;**140**:S-109. doi:10.1016/S0016-5085(11)60441-1
- 9 Cosnes J, Bourrier A, Laharie D, *et al.* Early administration of azathioprine vs conventional management of Crohn’s Disease: a randomized controlled trial. *Gastroenterology* 2013;**145**:758–65.

- 1  
2  
3 doi:10.1053/j.gastro.2013.04.048  
4  
5 10 Hart AL, Lomer M, Verjee A, *et al.* What are the top 10 research  
6 questions in the treatment of inflammatory bowel disease? *J Crohn's*  
7 *Colitis* 2017;**11**:204–11. doi:10.1093/ecco-jcc/jjw144  
8  
9 11 Lee JC, Lyons PA, McKinney EF, *et al.* Gene expression profiling of  
10 CD8+ T cells predicts prognosis in patients with Crohn disease and  
11 ulcerative colitis. *J Clin Invest* 2011;**121**:4170–9.  
12 doi:10.1172/JCI59255DS1  
13  
14 12 McKinney EF, Lyons PA, Carr EJ, *et al.* A CD8+T cell transcription  
15 signature predicts prognosis in autoimmune disease. *Nat Med*  
16 2010;**16**:586–91. doi:10.1038/nm.2130  
17  
18 13 McKinney EF, Lee JC, Jayne DRW, *et al.* T-cell exhaustion, co-  
19 stimulation and clinical outcome in autoimmunity and infection. *Nature*  
20 2015;**523**:612–6. doi:10.1038/nature14468  
21  
22 14 Lee J, Biasci D, Noor N, *et al.* PROFILE trial: predicting outcomes for  
23 Crohn's disease using a molecular biomarker. *Gut* 2017;**66**:A22–3.  
24 doi:10.1136/gutjnl-2017-314472.44  
25  
26 15 Freidlin B, McShane LM, Korn EL. Randomized clinical trials with  
27 biomarkers: Design issues. *J. Natl. Cancer Inst.* 2010;**102**:152–60.  
28 doi:10.1093/jnci/djp477  
29  
30 16 Potti A, Mukherjee S, Petersen R, *et al.* A Genomic Strategy to Refine  
31 Prognosis in Early-Stage Non-Small-Cell Lung Cancer. *N Engl J Med*  
32 2006;**355**:570–80. doi:10.1056/NEJMoa060467  
33  
34 17 Gomollón F, Dignass A, Annese V, *et al.* 3rd European evidence-based  
35 consensus on the diagnosis and management of Crohn's disease 2016:  
36 Part 1: Diagnosis and medical management. *J Crohn's Colitis*  
37 2017;**11**:3–25. doi:10.1093/ecco-jcc/jjw168  
38  
39 18 Su C, Lewis JD, Goldberg B, *et al.* A Meta-Analysis of the Placebo  
40 Rates of Remission and Response in Clinical Trials of Active Ulcerative  
41 Colitis. *Gastroenterology* 2007;**132**:516–26.  
42 doi:10.1053/j.gastro.2006.12.037  
43  
44 19 Heap GA, Weedon MN, Bewshea CM, *et al.* HLA-DQA1-HLA-DRB1  
45 variants confer susceptibility to pancreatitis induced by thiopurine  
46 immunosuppressants. *Nat Genet* 2014;**46**:1131–4. doi:10.1038/ng.3093  
47  
48  
49  
50  
51  
52  
53  
54  
55  
56  
57  
58  
59  
60

- 1  
2  
3 20 Bretz F, Maurer W, Brannath W, *et al.* A graphical approach to  
4 sequentially rejective multiple test procedures. *Stat Med* 2009;**28**:586–  
5 604. doi:10.1002/sim.3495  
6  
7  
8 21 Rutgeerts P, Van Assche G, Sandborn WJ, *et al.* Adalimumab induces  
9 and maintains mucosal healing in patients with Crohn's disease: Data  
10 from the EXTEND trial. *Inflamm Bowel Dis* 2012;**142**:1102–1111.  
11 doi:10.1053/j.gastro.2012.01.035  
12  
13  
14 22 Baert F, Moortgat L, Van Assche G, *et al.* Mucosal Healing Predicts  
15 Sustained Clinical Remission in Patients With Early-Stage Crohn's  
16 Disease. *Gastroenterology* 2010;**138**:463–8.  
17 doi:10.1053/j.gastro.2009.09.056  
18  
19  
20 23 Feagan BG, Sandborn WJ, D'Haens G, *et al.* The role of centralized  
21 reading of endoscopy in a randomized controlled trial of mesalamine for  
22 ulcerative colitis. *Gastroenterology* 2013;**145**.  
23 doi:10.1053/j.gastro.2013.03.025  
24  
25  
26  
27 24 Feagan B, Sandborn WJ, Rutgeerts P, *et al.* Performance of Crohn's  
28 disease Clinical Trial Endpoints based upon Different Cutoffs for Patient  
29 Reported Outcomes or Endoscopic Activity: Analysis of EXTEND Data.  
30 *Inflamm Bowel Dis* 2018;**00**:1–11. doi:10.1093/ibd/izx082  
31  
32  
33 25 Daperno M, D'Haens G, Van Assche G, *et al.* Development and  
34 validation of a new, simplified endoscopic activity score for Crohn's  
35 disease: The SES-CD. *Gastrointest Endosc* 2004;**60**:505–12.  
36 doi:10.1016/S0016-5107(04)01878-4  
37  
38  
39  
40 26 Khanna R, Zou G, D'Haens G, *et al.* Reliability among central readers in  
41 the evaluation of endoscopic findings from patients with Crohn's  
42 disease. *Gut* 2016;**65**:1119–25. doi:10.1136/gutjnl-2014-308973  
43  
44  
45 27 Reinisch W, Colombel JF, D'Haens G, *et al.* Characterisation of  
46 mucosal healing with adalimumab treatment in patients with moderately  
47 to severely active Crohn's disease: Results from the EXTEND trial. *J*  
48 *Crohn's Colitis* 2017;**11**:425–34. doi:10.1093/ecco-jcc/jjw178  
49  
50  
51 28 Rimola J, Rodriguez S, García-Bosch O, *et al.* Magnetic resonance for  
52 assessment of disease activity and severity in ileocolonic Crohn's  
53 disease. *Gut* 2009;**58**:1113–20. doi:10.1136/gut.2008.167957  
54  
55  
56 29 Rimola J, Ordás I, Rodriguez S, *et al.* Magnetic resonance imaging for  
57  
58  
59

- 1  
2  
3 evaluation of Crohn's disease: Validation of parameters of severity and  
4 quantitative index of activity. *Inflamm Bowel Dis* 2011;**17**:1759–68.  
5 doi:10.1002/ibd.21551  
6  
7  
8 30 Ordás I, Rimola J, Rodríguez S, *et al*. Accuracy of magnetic resonance  
9 enterography in assessing response to therapy and mucosal healing in  
10 patients with Crohn's disease. *Gastroenterology* 2014;**146**.  
11 doi:10.1053/j.gastro.2013.10.055  
12  
13  
14 31 Jairath V, Ordas I, Zou G, *et al*. Reliability of Measuring Ileo-Colonic  
15 Disease Activity in Crohn's Disease by Magnetic Resonance  
16 Enterography. *Inflamm Bowel Dis* 2018;**24**:440–9.  
17 doi:10.1093/ibd/izx040  
18  
19  
20 32 Chan AW, Tetzlaff JM, Altman DG, *et al*. SPIRIT 2013 statement:  
21 Defining standard protocol items for clinical trials. *Ann. Intern. Med.*  
22 2013;**158**:200–7. doi:10.7326/0003-4819-158-3-201302050-00583  
23  
24  
25  
26  
27  
28  
29  
30  
31  
32  
33  
34  
35  
36  
37  
38  
39  
40  
41  
42  
43  
44  
45  
46  
47  
48  
49  
50  
51  
52  
53  
54  
55  
56  
57  
58  
59  
60



1  
2  
3 **Author statement:** MP, NMN, FD, KGCS and JCL wrote the full trial protocol.  
4 HL modified final draft versions of the protocol. The Statistics and Data  
5 Analysis sections of the trial protocol were written by SB. LW contributed to  
6 the Trial Treatment section of the protocol, and SU contributed to the  
7 Radiology section. PAL, EFM, MP, KGCS and JCL were the initiators of this  
8 trial. All authors took part in reading and final approval of the manuscript.  
9  
10  
11  
12  
13

14 **Acknowledgements:** We are grateful for input and assistance from Carrie  
15 Bayliss (Cambridge Clinical Trials Unit) and Dr Amanda Wooding (Cambridge  
16 Enterprise) in securing funding for this trial, and to Dr Adrian Mander, Prof  
17 Robert Gray, Prof Geert D'Haens, Prof Severine Vermeire, Dr Sharon  
18 O'Byrne, Prof Subrata Ghosh, Dr Nick Carroll and Dr Ed Godfrey for helpful  
19 discussion regarding the protocol. We are grateful to the patients who  
20 provided feedback on the study design and documentation. The protocol has  
21 been peer reviewed by the British Society of Gastroenterology IBD Clinical  
22 Research Group (BSG IBD CRG). Details of participating centres can be  
23 found at <http://www.crohnsprofiletrial.com/index.php/investigators/>. KGCS is a  
24 Wellcome Investigator and an NIHR Senior Investigator. EFM and JCL are  
25 supported by Wellcome Trust Intermediate Clinical Fellowships  
26 (104064/Z/14/Z and 105920/Z/14/Z respectively).  
27  
28  
29  
30  
31  
32  
33  
34  
35  
36

37 **Patient records:** Data are collected via a paper CRF, provided by the trial co-  
38 ordination team, and after being input electronically, will be stored in a  
39 secured database. Participants will only be identifiable by a trial-specific  
40 number in the database. Essential documents will be retained until at least 15  
41 years after the publication of the clinical trial report.  
42  
43  
44  
45

46 **Trial committees:** The unblinded data will be presented to the Data  
47 Monitoring Committee, who will meet on a regular basis throughout the trial  
48 and who are independent from the sponsor. The Data Monitoring Committee  
49 will then prepare a report for the Trial Steering Committee who will provide  
50 overall supervision of the trial.  
51  
52  
53  
54  
55  
56  
57  
58  
59  
60

1  
2  
3 **Funding:** This trial is funded by the Wellcome Trust via an investment in  
4 PredictImmune (200448/Z/16/Z). The Apex Healthcare Consulting survey and  
5 biomarker development work described herein was funded by a Wellcome  
6 Trust Interim Translational Award (099450/Z/12/Z). The trial is co-sponsored  
7 by Cambridge University Hospitals NHS Foundation Trust and University of  
8 Cambridge. The sponsors are not involved in study design; collection,  
9 management, analysis, and interpretation of data; writing of the report; and  
10 the decision to submit the report for publication.  
11  
12  
13  
14  
15

16  
17 **Competing interests statement:** PAL, EFM, KGCS and JCL are co-  
18 inventors on a patent covering the method of assessing prognosis in IBD.  
19 PAL, EFM, and KGCS are co-founders and consultants for PredictImmune.  
20 PK and APS are employees of PredictImmune. JCL is a consultant for  
21 PredictImmune.  
22  
23  
24  
25

26  
27 **Word count:** 3281/4000  
28  
29  
30  
31  
32  
33  
34  
35  
36  
37  
38  
39  
40  
41  
42  
43  
44  
45  
46  
47  
48  
49  
50  
51  
52  
53  
54  
55  
56  
57  
58  
59  
60

## Figure legends

### Figure 1 – Trial Design

Following biomarker stratification, patients will be randomised in a 1:1 fashion to either “Top-Down” or “Accelerated Step-Up” treatment arms.

### Figure 2 – Trial visits for participants.

Patients randomised to “Accelerated Step-Up” will have a total of 5 further trial visits after their initial screening visit. Participants randomised to the “Top-Down” group will be started on Infliximab at week 2. All further Infliximab infusion visits should be aligned to scheduled trial visits wherever possible in order to minimise visit burden for participants. Participants in the “Top-Down” group will also have 5 trial visits and will also attend hospital an additional 4 times for infliximab infusions. Randomisation occurs at week 0.

Figure 1. Biomarker stratified trial design

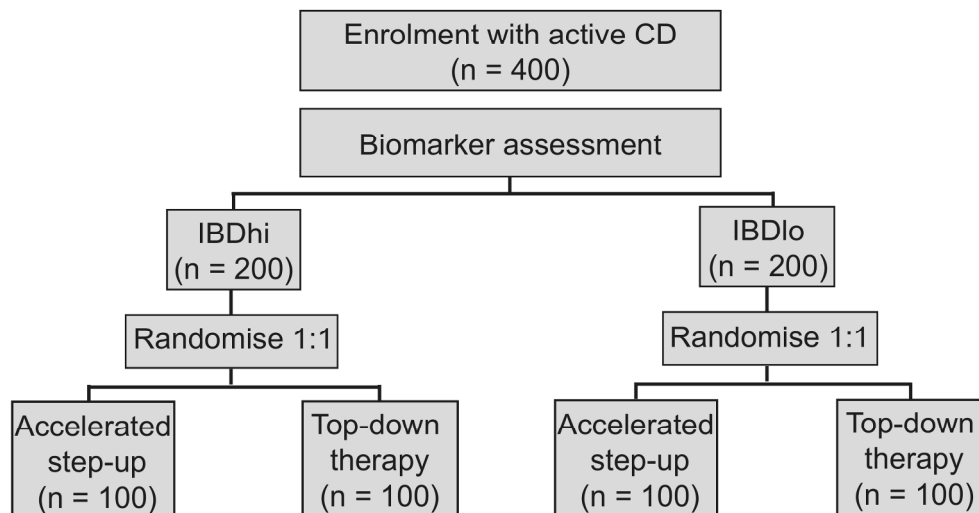

Figure 1 – Trial Design

Following biomarker stratification, patients will be randomised in a 1:1 fashion to either “Top-Down” or “Accelerated Step-Up” treatment arms.

213x124mm (300 x 300 DPI)

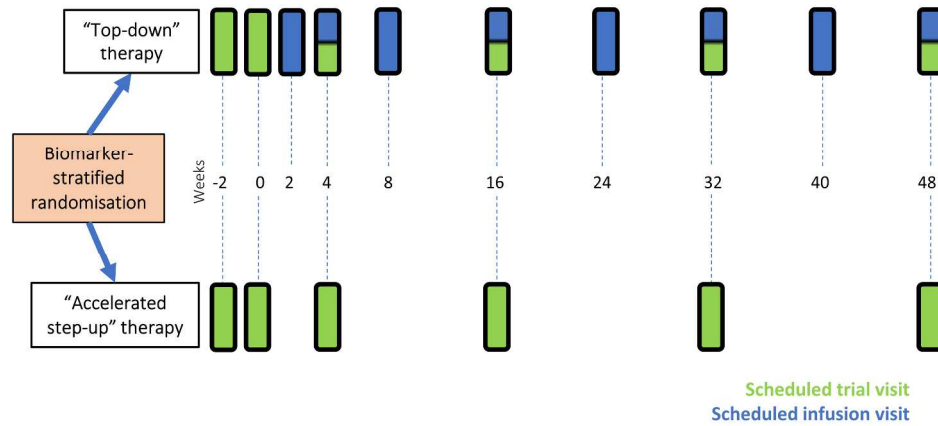

Figure 2 – Trial visits for participants.

Patients randomised to “Accelerated Step-Up” will have a total of 5 further trial visits after their initial screening visit. Participants randomised to the “Top-Down” group will be started on Infliximab at week 2. All further Infliximab infusion visits should be aligned to scheduled trial visits wherever possible in order to minimise visit burden for participants. Participants in the “Top-Down” group will also have 5 trial visits and will also attend hospital an additional 4 times for infliximab infusions. Randomisation occurs at week 0.

125x89mm (600 x 600 DPI)

only

Supplementary Material

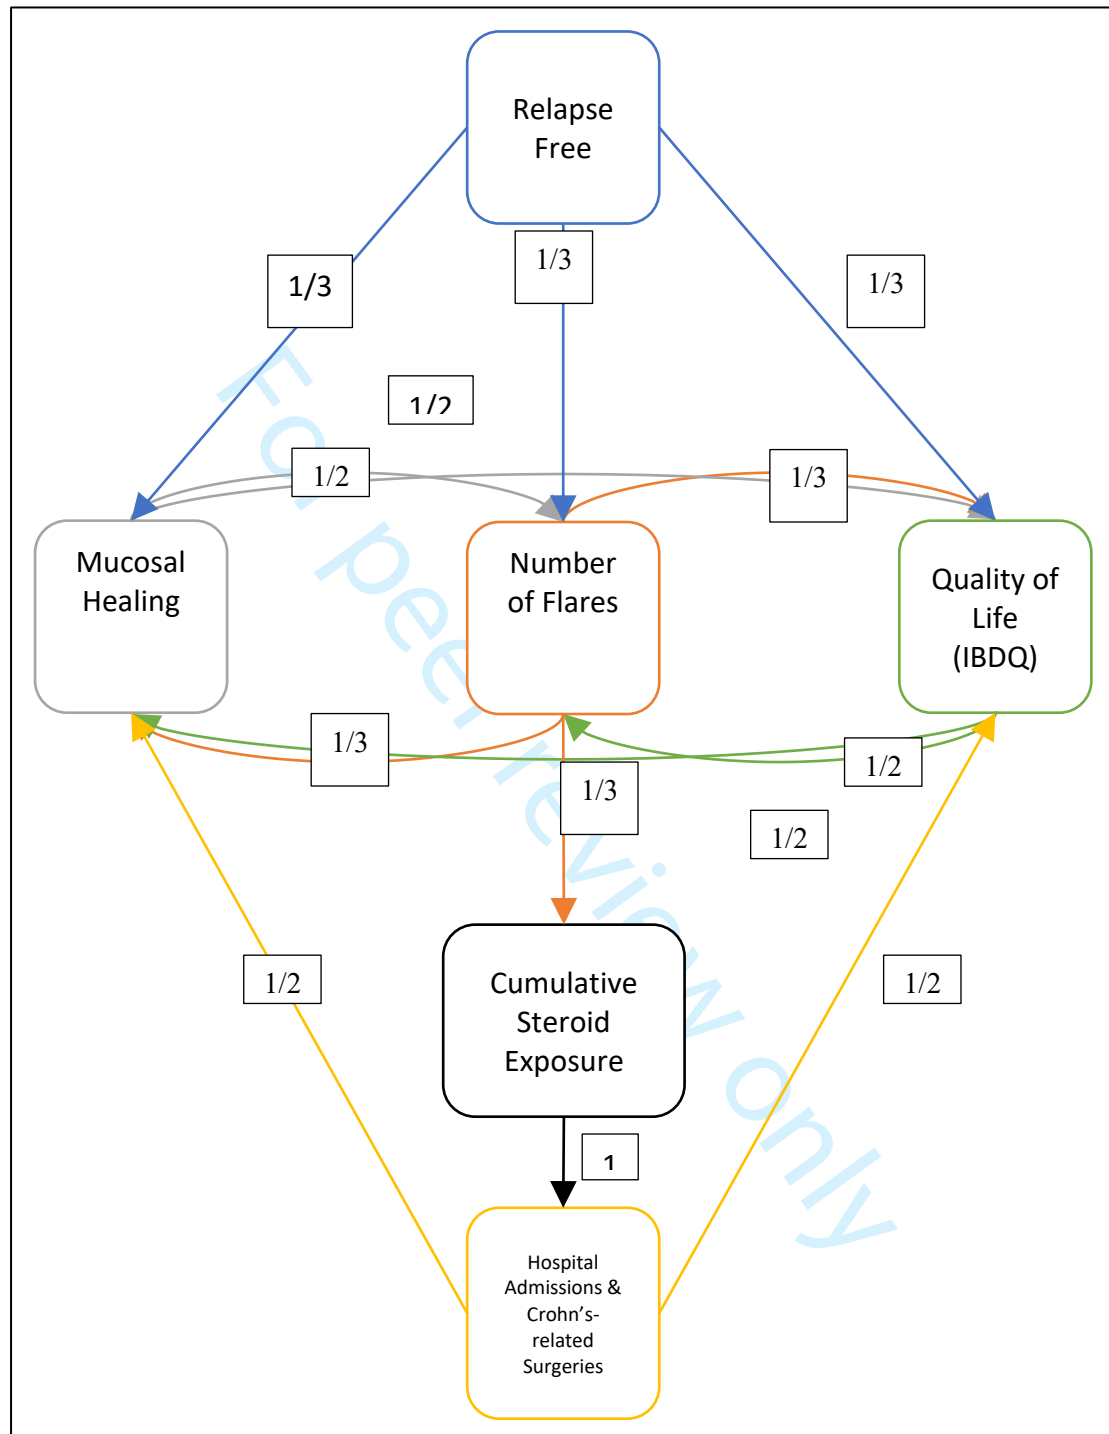

**Supplementary Figure 1 – Statistical approach for the PROFILE trial.**

The methodology will combine together gate-keeping and Holm-Bonferroni methods in formal hypothesis testing, with the above diagram defining how the significance levels will be transitioned assuming an initial configuration of 5% at the primary endpoint (relapse-free remission) and 0% on all other tests. All the secondary endpoints are continuous variables and will be analysed using a linear regression framework adjusting for baseline covariates.

# Reporting checklist for protocol of a clinical trial.

Based on the SPIRIT guidelines.

## Instructions to authors

Complete this checklist by entering the page numbers from your manuscript where readers will find each of the items listed below.

Your article may not currently address all the items on the checklist. Please modify your text to include the missing information. If you are certain that an item does not apply, please write "n/a" and provide a short explanation.

Upload your completed checklist as an extra file when you submit to a journal.

In your methods section, say that you used the SPIRIT reporting guidelines, and cite them as:

Chan A-W, Tetzlaff JM, Altman DG, Laupacis A, Gøtzsche PC, Krleža-Jerić K, Hróbjartsson A, Mann H, Dickersin K, Berlin J, Doré C, Parulekar W, Summerskill W, Groves T, Schulz K, Sox H, Rockhold FW, Rennie D, Moher D. SPIRIT 2013 Statement: Defining standard protocol items for clinical trials. *Ann Intern Med.* 2013;158(3):200-207

|                              |                     | Reporting Item                                                                                               | Page Number                                                                                                                                                                                                                    |
|------------------------------|---------------------|--------------------------------------------------------------------------------------------------------------|--------------------------------------------------------------------------------------------------------------------------------------------------------------------------------------------------------------------------------|
| Title                        | <a href="#">#1</a>  | Descriptive title identifying the study design, population, interventions, and, if applicable, trial acronym | 1                                                                                                                                                                                                                              |
| Trial registration           | <a href="#">#2a</a> | Trial identifier and registry name. If not yet registered, name of intended registry                         | 3                                                                                                                                                                                                                              |
| Trial registration: data set | <a href="#">#2b</a> | All items from the World Health Organization Trial Registration Data Set                                     | 1 (contacts, title), 2 (registration details, countries of recruitment, disease, intervention, study type, sample size, primary and secondary outcomes), 11 (inclusion / exclusion criteria), 17 (ethics review), 24 (sponsor) |
| Protocol version             | <a href="#">#3</a>  | Date and version identifier                                                                                  | 7                                                                                                                                                                                                                              |

|    |                                                         |                     |                                                                                                                                                                                                                                                                                          |       |
|----|---------------------------------------------------------|---------------------|------------------------------------------------------------------------------------------------------------------------------------------------------------------------------------------------------------------------------------------------------------------------------------------|-------|
| 1  | Funding                                                 | <a href="#">#4</a>  | Sources and types of financial, material, and other support                                                                                                                                                                                                                              | 22-23 |
| 2  |                                                         |                     |                                                                                                                                                                                                                                                                                          |       |
| 3  |                                                         |                     |                                                                                                                                                                                                                                                                                          |       |
| 4  | Roles and responsibilities: contributorship             | <a href="#">#5a</a> | Names, affiliations, and roles of protocol contributors                                                                                                                                                                                                                                  | 22    |
| 5  |                                                         |                     |                                                                                                                                                                                                                                                                                          |       |
| 6  |                                                         |                     |                                                                                                                                                                                                                                                                                          |       |
| 7  |                                                         |                     |                                                                                                                                                                                                                                                                                          |       |
| 8  |                                                         |                     |                                                                                                                                                                                                                                                                                          |       |
| 9  |                                                         |                     |                                                                                                                                                                                                                                                                                          |       |
| 10 | Roles and responsibilities: sponsor contact information | <a href="#">#5b</a> | Name and contact information for the trial sponsor                                                                                                                                                                                                                                       | 23    |
| 11 |                                                         |                     |                                                                                                                                                                                                                                                                                          |       |
| 12 |                                                         |                     |                                                                                                                                                                                                                                                                                          |       |
| 13 |                                                         |                     |                                                                                                                                                                                                                                                                                          |       |
| 14 |                                                         |                     |                                                                                                                                                                                                                                                                                          |       |
| 15 |                                                         |                     |                                                                                                                                                                                                                                                                                          |       |
| 16 |                                                         |                     |                                                                                                                                                                                                                                                                                          |       |
| 17 | Roles and responsibilities: sponsor and funder          | <a href="#">#5c</a> | Role of study sponsor and funders, if any, in study design; collection, management, analysis, and interpretation of data; writing of the report; and the decision to submit the report for publication, including whether they will have ultimate authority over any of these activities | 23    |
| 18 |                                                         |                     |                                                                                                                                                                                                                                                                                          |       |
| 19 |                                                         |                     |                                                                                                                                                                                                                                                                                          |       |
| 20 |                                                         |                     |                                                                                                                                                                                                                                                                                          |       |
| 21 |                                                         |                     |                                                                                                                                                                                                                                                                                          |       |
| 22 |                                                         |                     |                                                                                                                                                                                                                                                                                          |       |
| 23 |                                                         |                     |                                                                                                                                                                                                                                                                                          |       |
| 24 |                                                         |                     |                                                                                                                                                                                                                                                                                          |       |
| 25 |                                                         |                     |                                                                                                                                                                                                                                                                                          |       |
| 26 |                                                         |                     |                                                                                                                                                                                                                                                                                          |       |
| 27 |                                                         |                     |                                                                                                                                                                                                                                                                                          |       |
| 28 |                                                         |                     |                                                                                                                                                                                                                                                                                          |       |
| 29 |                                                         |                     |                                                                                                                                                                                                                                                                                          |       |
| 30 | Roles and responsibilities: committees                  | <a href="#">#5d</a> | Composition, roles, and responsibilities of the coordinating centre, steering committee, endpoint adjudication committee, data management team, and other individuals or groups overseeing the trial, if applicable (see Item 21a for data monitoring committee)                         | 22    |
| 31 |                                                         |                     |                                                                                                                                                                                                                                                                                          |       |
| 32 |                                                         |                     |                                                                                                                                                                                                                                                                                          |       |
| 33 |                                                         |                     |                                                                                                                                                                                                                                                                                          |       |
| 34 |                                                         |                     |                                                                                                                                                                                                                                                                                          |       |
| 35 |                                                         |                     |                                                                                                                                                                                                                                                                                          |       |
| 36 |                                                         |                     |                                                                                                                                                                                                                                                                                          |       |
| 37 |                                                         |                     |                                                                                                                                                                                                                                                                                          |       |
| 38 |                                                         |                     |                                                                                                                                                                                                                                                                                          |       |
| 39 |                                                         |                     |                                                                                                                                                                                                                                                                                          |       |
| 40 |                                                         |                     |                                                                                                                                                                                                                                                                                          |       |
| 41 | Background and rationale                                | <a href="#">#6a</a> | Description of research question and justification for undertaking the trial, including summary of relevant studies (published and unpublished) examining benefits and harms for each intervention                                                                                       | 5-7   |
| 42 |                                                         |                     |                                                                                                                                                                                                                                                                                          |       |
| 43 |                                                         |                     |                                                                                                                                                                                                                                                                                          |       |
| 44 |                                                         |                     |                                                                                                                                                                                                                                                                                          |       |
| 45 |                                                         |                     |                                                                                                                                                                                                                                                                                          |       |
| 46 |                                                         |                     |                                                                                                                                                                                                                                                                                          |       |
| 47 |                                                         |                     |                                                                                                                                                                                                                                                                                          |       |
| 48 |                                                         |                     |                                                                                                                                                                                                                                                                                          |       |
| 49 | Background and rationale: choice of comparators         | <a href="#">#6b</a> | Explanation for choice of comparators                                                                                                                                                                                                                                                    | 5-7   |
| 50 |                                                         |                     |                                                                                                                                                                                                                                                                                          |       |
| 51 |                                                         |                     |                                                                                                                                                                                                                                                                                          |       |
| 52 |                                                         |                     |                                                                                                                                                                                                                                                                                          |       |
| 53 |                                                         |                     |                                                                                                                                                                                                                                                                                          |       |
| 54 | Objectives                                              | <a href="#">#7</a>  | Specific objectives or hypotheses                                                                                                                                                                                                                                                        | 9     |
| 55 |                                                         |                     |                                                                                                                                                                                                                                                                                          |       |
| 56 |                                                         |                     |                                                                                                                                                                                                                                                                                          |       |
| 57 | Trial design                                            | <a href="#">#8</a>  | Description of trial design including type of trial (eg, parallel group, crossover,                                                                                                                                                                                                      | 9     |
| 58 |                                                         |                     |                                                                                                                                                                                                                                                                                          |       |
| 59 |                                                         |                     |                                                                                                                                                                                                                                                                                          |       |
| 60 |                                                         |                     |                                                                                                                                                                                                                                                                                          |       |



|    |                      |                                                              |       |
|----|----------------------|--------------------------------------------------------------|-------|
| 1  |                      | factorial, single group), allocation ratio,                  |       |
| 2  |                      | and framework (eg, superiority,                              |       |
| 3  |                      | equivalence, non-inferiority, exploratory)                   |       |
| 4  |                      |                                                              |       |
| 5  | Study setting        | <a href="#">#9</a> Description of study settings (eg,        | 9     |
| 6  |                      | community clinic, academic hospital) and                     |       |
| 7  |                      | list of countries where data will be                         |       |
| 8  |                      | collected. Reference to where list of                        |       |
| 9  |                      | study sites can be obtained                                  |       |
| 10 |                      |                                                              |       |
| 11 | Eligibility criteria | <a href="#">#10</a> Inclusion and exclusion criteria for     | 11    |
| 12 |                      | participants. If applicable, eligibility                     |       |
| 13 |                      | criteria for study centres and individuals                   |       |
| 14 |                      | who will perform the interventions (eg,                      |       |
| 15 |                      | surgeons, psychotherapists)                                  |       |
| 16 |                      |                                                              |       |
| 17 | Interventions:       | <a href="#">#11a</a> Interventions for each group with       | 13-14 |
| 18 | description          | sufficient detail to allow replication,                      |       |
| 19 |                      | including how and when they will be                          |       |
| 20 |                      | administered                                                 |       |
| 21 |                      |                                                              |       |
| 22 | Interventions:       | <a href="#">#11b</a> Criteria for discontinuing or modifying | 13-14 |
| 23 | modifications        | allocated interventions for a given trial                    |       |
| 24 |                      | participant (eg, drug dose change in                         |       |
| 25 |                      | response to harms, participant request,                      |       |
| 26 |                      | or improving / worsening disease)                            |       |
| 27 |                      |                                                              |       |
| 28 | Interventions:       | <a href="#">#11c</a> Strategies to improve adherence to      | 14    |
| 29 | adherence            | intervention protocols, and any                              |       |
| 30 |                      | procedures for monitoring adherence                          |       |
| 31 |                      | (eg, drug tablet return; laboratory tests)                   |       |
| 32 |                      |                                                              |       |
| 33 | Interventions:       | <a href="#">#11d</a> Relevant concomitant care and           | 13    |
| 34 | concomitant care     | interventions that are permitted or                          |       |
| 35 |                      | prohibited during the trial                                  |       |
| 36 |                      |                                                              |       |
| 37 | Outcomes             | <a href="#">#12</a> Primary, secondary, and other outcomes,  | 12    |
| 38 |                      | including the specific measurement                           |       |
| 39 |                      | variable (eg, systolic blood pressure),                      |       |
| 40 |                      | analysis metric (eg, change from                             |       |
| 41 |                      | baseline, final value, time to event),                       |       |
| 42 |                      | method of aggregation (eg, median,                           |       |
| 43 |                      | proportion), and time point for each                         |       |
| 44 |                      |                                                              |       |
| 45 |                      |                                                              |       |
| 46 |                      |                                                              |       |
| 47 |                      |                                                              |       |
| 48 |                      |                                                              |       |
| 49 |                      |                                                              |       |
| 50 |                      |                                                              |       |
| 51 |                      |                                                              |       |
| 52 |                      |                                                              |       |
| 53 |                      |                                                              |       |
| 54 |                      |                                                              |       |
| 55 |                      |                                                              |       |
| 56 |                      |                                                              |       |
| 57 |                      |                                                              |       |
| 58 |                      |                                                              |       |
| 59 |                      |                                                              |       |
| 60 |                      |                                                              |       |

outcome. Explanation of the clinical relevance of chosen efficacy and harm outcomes is strongly recommended

|    |                    |                      |                                              |
|----|--------------------|----------------------|----------------------------------------------|
| 1  |                    |                      |                                              |
| 2  |                    |                      |                                              |
| 3  |                    |                      |                                              |
| 4  |                    |                      |                                              |
| 5  | Participant        | <a href="#">#13</a>  | Time schedule of enrolment, Fig.2            |
| 6  | timeline           |                      |                                              |
| 7  |                    |                      | interventions (including any run-ins and     |
| 8  |                    |                      | washouts), assessments, and visits for       |
| 9  |                    |                      | participants. A schematic diagram is         |
| 10 |                    |                      | highly recommended (see Figure)              |
| 11 |                    |                      |                                              |
| 12 |                    |                      |                                              |
| 13 |                    |                      |                                              |
| 14 | Sample size        | <a href="#">#14</a>  | Estimated number of participants needed 9,15 |
| 15 |                    |                      | to achieve study objectives and how it       |
| 16 |                    |                      | was determined, including clinical and       |
| 17 |                    |                      | statistical assumptions supporting any       |
| 18 |                    |                      | sample size calculations                     |
| 19 |                    |                      |                                              |
| 20 |                    |                      |                                              |
| 21 |                    |                      |                                              |
| 22 | Recruitment        | <a href="#">#15</a>  | Strategies for achieving adequate 9          |
| 23 |                    |                      | participant enrolment to reach target        |
| 24 |                    |                      | sample size                                  |
| 25 |                    |                      |                                              |
| 26 |                    |                      |                                              |
| 27 | Allocation:        | <a href="#">#16a</a> | Method of generating the allocation 12-13    |
| 28 | sequence           |                      | sequence (eg, computer-generated             |
| 29 | generation         |                      | random numbers), and list of any factors     |
| 30 |                    |                      | for stratification. To reduce predictability |
| 31 |                    |                      | of a random sequence, details of any         |
| 32 |                    |                      | planned restriction (eg, blocking) should    |
| 33 |                    |                      | be provided in a separate document that      |
| 34 |                    |                      | is unavailable to those who enrol            |
| 35 |                    |                      | participants or assign interventions         |
| 36 |                    |                      |                                              |
| 37 |                    |                      |                                              |
| 38 |                    |                      |                                              |
| 39 |                    |                      |                                              |
| 40 |                    |                      |                                              |
| 41 | Allocation         | <a href="#">#16b</a> | Mechanism of implementing the 13             |
| 42 | concealment        |                      | allocation sequence (eg, central             |
| 43 | mechanism          |                      | telephone; sequentially numbered,            |
| 44 |                    |                      | opaque, sealed envelopes), describing        |
| 45 |                    |                      | any steps to conceal the sequence until      |
| 46 |                    |                      | interventions are assigned                   |
| 47 |                    |                      |                                              |
| 48 |                    |                      |                                              |
| 49 |                    |                      |                                              |
| 50 |                    |                      |                                              |
| 51 | Allocation:        | <a href="#">#16c</a> | Who will generate the allocation 9,13        |
| 52 | implementation     |                      | sequence, who will enrol participants,       |
| 53 |                    |                      | and who will assign participants to          |
| 54 |                    |                      | interventions                                |
| 55 |                    |                      |                                              |
| 56 |                    |                      |                                              |
| 57 |                    |                      |                                              |
| 58 | Blinding (masking) | <a href="#">#17a</a> | Who will be blinded after assignment to 13   |
| 59 |                    |                      |                                              |
| 60 |                    |                      |                                              |

interventions (eg, trial participants, care providers, outcome assessors, data analysts), and how

|    |                 |                                               |                                |
|----|-----------------|-----------------------------------------------|--------------------------------|
| 1  |                 |                                               |                                |
| 2  |                 |                                               |                                |
| 3  |                 |                                               |                                |
| 4  |                 |                                               |                                |
| 5  |                 |                                               |                                |
| 6  | Blinding        | <a href="#">#17b</a>                          |                                |
| 7  | (masking):      | If blinded, circumstances under which         | n/a – blinding is to biomarker |
| 8  | emergency       | unblinding is permissible, and procedure      | status not to treatment.       |
| 9  | unblinding      | for revealing a participant's allocated       |                                |
| 10 |                 | intervention during the trial                 |                                |
| 11 |                 |                                               |                                |
| 12 | Data collection | <a href="#">#18a</a>                          |                                |
| 13 | plan            | Plans for assessment and collection of        | 22                             |
| 14 |                 | outcome, baseline, and other trial data,      |                                |
| 15 |                 | including any related processes to            |                                |
| 16 |                 | promote data quality (eg, duplicate           |                                |
| 17 |                 | measurements, training of assessors)          |                                |
| 18 |                 | and a description of study instruments        |                                |
| 19 |                 | (eg, questionnaires, laboratory tests)        |                                |
| 20 |                 | along with their reliability and validity, if |                                |
| 21 |                 | known. Reference to where data                |                                |
| 22 |                 | collection forms can be found, if not in      |                                |
| 23 |                 | the protocol                                  |                                |
| 24 |                 |                                               |                                |
| 25 |                 |                                               |                                |
| 26 |                 |                                               |                                |
| 27 |                 |                                               |                                |
| 28 |                 |                                               |                                |
| 29 | Data collection | <a href="#">#18b</a>                          |                                |
| 30 | plan: retention | Plans to promote participant retention        | 22                             |
| 31 |                 | and complete follow-up, including list of     |                                |
| 32 |                 | any outcome data to be collected for          |                                |
| 33 |                 | participants who discontinue or deviate       |                                |
| 34 |                 | from intervention protocols                   |                                |
| 35 |                 |                                               |                                |
| 36 |                 |                                               |                                |
| 37 |                 |                                               |                                |
| 38 | Data management | <a href="#">#19</a>                           |                                |
| 39 |                 | Plans for data entry, coding, security,       | 22                             |
| 40 |                 | and storage, including any related            |                                |
| 41 |                 | processes to promote data quality (eg,        |                                |
| 42 |                 | double data entry; range checks for data      |                                |
| 43 |                 | values). Reference to where details of        |                                |
| 44 |                 | data management procedures can be             |                                |
| 45 |                 | found, if not in the protocol                 |                                |
| 46 |                 |                                               |                                |
| 47 |                 |                                               |                                |
| 48 |                 |                                               |                                |
| 49 | Statistics:     | <a href="#">#20a</a>                          |                                |
| 50 | outcomes        | Statistical methods for analysing primary     | 15, supp. Fig 1                |
| 51 |                 | and secondary outcomes. Reference to          |                                |
| 52 |                 | where other details of the statistical        |                                |
| 53 |                 | analysis plan can be found, if not in the     |                                |
| 54 |                 | protocol                                      |                                |
| 55 |                 |                                               |                                |
| 56 |                 |                                               |                                |
| 57 | Statistics:     | <a href="#">#20b</a>                          |                                |
| 58 |                 | Methods for any additional analyses (eg,      | 15-16, supp. Fig 1             |
| 59 |                 |                                               |                                |
| 60 |                 |                                               |                                |

|                                                                                                                                        |                                                  |                      |                                                                                                                                                                                                                                                                                                                                       |                                                                                                                                                                                                                                             |
|----------------------------------------------------------------------------------------------------------------------------------------|--------------------------------------------------|----------------------|---------------------------------------------------------------------------------------------------------------------------------------------------------------------------------------------------------------------------------------------------------------------------------------------------------------------------------------|---------------------------------------------------------------------------------------------------------------------------------------------------------------------------------------------------------------------------------------------|
| 1<br>2<br>3<br>4<br>5<br>6<br>7<br>8<br>9<br>10<br>11                                                                                  | additional analyses                              |                      | subgroup and adjusted analyses)                                                                                                                                                                                                                                                                                                       |                                                                                                                                                                                                                                             |
| 12<br>13<br>14<br>15<br>16<br>17<br>18<br>19<br>20<br>21<br>22<br>23<br>24<br>25<br>26<br>27<br>28<br>29<br>30<br>31<br>32<br>33<br>34 | Statistics: analysis population and missing data | <a href="#">#20c</a> | Definition of analysis population relating to protocol non-adherence (eg, as randomised analysis), and any statistical methods to handle missing data (eg, multiple imputation)                                                                                                                                                       | 15-16, supp. Fig 1                                                                                                                                                                                                                          |
| 35<br>36<br>37<br>38<br>39<br>40<br>41<br>42                                                                                           | Data monitoring: formal committee                | <a href="#">#21a</a> | Composition of data monitoring committee (DMC); summary of its role and reporting structure; statement of whether it is independent from the sponsor and competing interests; and reference to where further details about its charter can be found, if not in the protocol. Alternatively, an explanation of why a DMC is not needed | 22                                                                                                                                                                                                                                          |
| 43<br>44<br>45<br>46<br>47<br>48<br>49<br>50<br>51<br>52<br>53<br>54<br>55<br>56<br>57                                                 | Data monitoring: interim analysis                | <a href="#">#21b</a> | Description of any interim analyses and stopping guidelines, including who will have access to these interim results and make the final decision to terminate the trial                                                                                                                                                               | n/a – no interim analysis is planned.                                                                                                                                                                                                       |
| 58<br>59<br>60                                                                                                                         | Harms                                            | <a href="#">#22</a>  | Plans for collecting, assessing, reporting, and managing solicited and spontaneously reported adverse events and other unintended effects of trial interventions or trial conduct                                                                                                                                                     | 14                                                                                                                                                                                                                                          |
|                                                                                                                                        | Auditing                                         | <a href="#">#23</a>  | Frequency and procedures for auditing trial conduct, if any, and whether the process will be independent from investigators and the sponsor                                                                                                                                                                                           | n/a - a monitoring plan is currently in the process of being generated - detailing the frequency and scope of monitoring, including of trial conduct. All participating sites will be subject to routine trial specific on-site monitoring. |
|                                                                                                                                        | Research ethics                                  | <a href="#">#24</a>  | Plans for seeking research ethics                                                                                                                                                                                                                                                                                                     | 10                                                                                                                                                                                                                                          |

|    |                       |                      |                                              |                             |
|----|-----------------------|----------------------|----------------------------------------------|-----------------------------|
| 1  | approval              |                      | committee / institutional review board       |                             |
| 2  |                       |                      | (REC / IRB) approval                         |                             |
| 3  |                       |                      |                                              |                             |
| 4  | Protocol              | <a href="#">#25</a>  | Plans for communicating important            | 7                           |
| 5  | amendments            |                      | protocol modifications (eg, changes to       |                             |
| 6  |                       |                      | eligibility criteria, outcomes, analyses) to |                             |
| 7  |                       |                      | relevant parties (eg, investigators, REC /   |                             |
| 8  |                       |                      | IRBs, trial participants, trial registries,  |                             |
| 9  |                       |                      | journals, regulators)                        |                             |
| 10 |                       |                      |                                              |                             |
| 11 |                       |                      |                                              |                             |
| 12 |                       |                      |                                              |                             |
| 13 |                       |                      |                                              |                             |
| 14 | Consent or assent     | <a href="#">#26a</a> | Who will obtain informed consent or          | 14                          |
| 15 |                       |                      | assent from potential trial participants or  |                             |
| 16 |                       |                      | authorised surrogates, and how (see          |                             |
| 17 |                       |                      | Item 32)                                     |                             |
| 18 |                       |                      |                                              |                             |
| 19 |                       |                      |                                              |                             |
| 20 |                       |                      |                                              |                             |
| 21 | Consent or            | <a href="#">#26b</a> | Additional consent provisions for            | n/a – no additional consent |
| 22 | assent: ancillary     |                      | collection and use of participant data and   | forms will be used.         |
| 23 | studies               |                      | biological specimens in ancillary studies,   |                             |
| 24 |                       |                      | if applicable                                |                             |
| 25 |                       |                      |                                              |                             |
| 26 |                       |                      |                                              |                             |
| 27 | Confidentiality       | <a href="#">#27</a>  | How personal information about potential     | 12-14                       |
| 28 |                       |                      | and enrolled participants will be            |                             |
| 29 |                       |                      | collected, shared, and maintained in         |                             |
| 30 |                       |                      | order to protect confidentiality before,     |                             |
| 31 |                       |                      | during, and after the trial                  |                             |
| 32 |                       |                      |                                              |                             |
| 33 |                       |                      |                                              |                             |
| 34 |                       |                      |                                              |                             |
| 35 |                       |                      |                                              |                             |
| 36 | Declaration of        | <a href="#">#28</a>  | Financial and other competing interests      | 23                          |
| 37 | interests             |                      | for principal investigators for the overall  |                             |
| 38 |                       |                      | trial and each study site                    |                             |
| 39 |                       |                      |                                              |                             |
| 40 |                       |                      |                                              |                             |
| 41 | Data access           | <a href="#">#29</a>  | Statement of who will have access to the     | 17                          |
| 42 |                       |                      | final trial dataset, and disclosure of       |                             |
| 43 |                       |                      | contractual agreements that limit such       |                             |
| 44 |                       |                      | access for investigators                     |                             |
| 45 |                       |                      |                                              |                             |
| 46 |                       |                      |                                              |                             |
| 47 |                       |                      |                                              |                             |
| 48 | Ancillary and post    | <a href="#">#30</a>  | Provisions, if any, for ancillary and post-  | 14                          |
| 49 | trial care            |                      | trial care, and for compensation to those    |                             |
| 50 |                       |                      | who suffer harm from trial participation     |                             |
| 51 |                       |                      |                                              |                             |
| 52 |                       |                      |                                              |                             |
| 53 | Dissemination         | <a href="#">#31a</a> | Plans for investigators and sponsor to       | 10                          |
| 54 | policy: trial results |                      | communicate trial results to participants,   |                             |
| 55 |                       |                      | healthcare professionals, the public, and    |                             |
| 56 |                       |                      | other relevant groups (eg, via publication,  |                             |
| 57 |                       |                      |                                              |                             |
| 58 |                       |                      |                                              |                             |
| 59 |                       |                      |                                              |                             |
| 60 |                       |                      |                                              |                             |

reporting in results databases, or other data sharing arrangements), including any publication restrictions

|    |                    |                      |                                              |
|----|--------------------|----------------------|----------------------------------------------|
| 1  |                    |                      |                                              |
| 2  |                    |                      |                                              |
| 3  |                    |                      |                                              |
| 4  |                    |                      |                                              |
| 5  | Dissemination      | <a href="#">#31b</a> | Authorship eligibility guidelines and any    |
| 6  | policy: authorship |                      | intended use of professional writers         |
| 7  |                    |                      | 17                                           |
| 8  |                    |                      |                                              |
| 9  | Dissemination      | <a href="#">#31c</a> | Plans, if any, for granting public access    |
| 10 | policy:            |                      | to the full protocol, participant-level      |
| 11 | reproducible       |                      | dataset, and statistical code                |
| 12 | research           |                      | 7 – website link to the full trial           |
| 13 |                    |                      | protocol.                                    |
| 14 |                    |                      |                                              |
| 15 |                    |                      |                                              |
| 16 | Informed consent   | <a href="#">#32</a>  | Model consent form and other related         |
| 17 | materials          |                      | documentation given to participants and      |
| 18 |                    |                      | authorised surrogates                        |
| 19 |                    |                      | 7 – website link to full                     |
| 20 |                    |                      | participant information sheet                |
| 21 |                    |                      | and consent form.                            |
| 22 | Biological         | <a href="#">#33</a>  | Plans for collection, laboratory             |
| 23 | specimens          |                      | evaluation, and storage of biological        |
| 24 |                    |                      | specimens for genetic or molecular           |
| 25 |                    |                      | analysis in the current trial and for future |
| 26 |                    |                      | use in ancillary studies, if applicable      |
| 27 |                    |                      |                                              |
| 28 |                    |                      |                                              |
| 29 |                    |                      |                                              |

30 The SPIRIT checklist is distributed under the terms of the Creative Commons Attribution License CC-  
 31 BY-ND 3.0. This checklist can be completed online using <https://www.goodreports.org/>, a tool made  
 32 by the [EQUATOR Network](#) in collaboration with [Penelope.ai](#)  
 33

# BMJ Open

## Predicting outcomes for Crohn's disease using a molecular biomarker (PROFILE): protocol for a multi-centre, randomised, biomarker-stratified trial

|                                 |                                                                                                                                                                                                                                                                                                                                                                                                                                                                                                                                                                                                                                                                                                                                                                                                                                                                                                                                                                                                                                                   |
|---------------------------------|---------------------------------------------------------------------------------------------------------------------------------------------------------------------------------------------------------------------------------------------------------------------------------------------------------------------------------------------------------------------------------------------------------------------------------------------------------------------------------------------------------------------------------------------------------------------------------------------------------------------------------------------------------------------------------------------------------------------------------------------------------------------------------------------------------------------------------------------------------------------------------------------------------------------------------------------------------------------------------------------------------------------------------------------------|
| Journal:                        | <i>BMJ Open</i>                                                                                                                                                                                                                                                                                                                                                                                                                                                                                                                                                                                                                                                                                                                                                                                                                                                                                                                                                                                                                                   |
| Manuscript ID                   | bmjopen-2018-026767.R1                                                                                                                                                                                                                                                                                                                                                                                                                                                                                                                                                                                                                                                                                                                                                                                                                                                                                                                                                                                                                            |
| Article Type:                   | Protocol                                                                                                                                                                                                                                                                                                                                                                                                                                                                                                                                                                                                                                                                                                                                                                                                                                                                                                                                                                                                                                          |
| Date Submitted by the Author:   | 08-Oct-2018                                                                                                                                                                                                                                                                                                                                                                                                                                                                                                                                                                                                                                                                                                                                                                                                                                                                                                                                                                                                                                       |
| Complete List of Authors:       | <p>Parkes, M; University of Cambridge, Department of Medicine<br/>         Noor, Nurulamin; University of Cambridge, Department of Medicine<br/>         Dowling, Francis; Cambridge Clinical Trials Unit<br/>         Leung, Harvey; Cambridge Clinical Trials Unit<br/>         Bond, Simon; Cambridge Clinical Trials Unit; MRC Biostatistics Unit<br/>         Whitehead, Lynne; Cambridge University Hospitals NHS Foundation Trust, Clinical Trials Pharmacy<br/>         Upponi, Sara; Cambridge University Hospitals NHS Foundation Trust, Department of Radiology<br/>         Kinnon, Paul; PredictImmune Ltd<br/>         Sandham, Andrew; PredictImmune Ltd<br/>         Lyons, Paul; University of Cambridge, Department of Medicine; PredictImmune Ltd<br/>         McKinney, Eoin; University of Cambridge, Department of Medicine; PredictImmune Ltd<br/>         Smith, Kenneth; University of Cambridge, Department of Medicine; PredictImmune Ltd<br/>         Lee, James; University of Cambridge, Department of Medicine</p> |
| <b>Primary Subject Heading</b>: | Gastroenterology and hepatology                                                                                                                                                                                                                                                                                                                                                                                                                                                                                                                                                                                                                                                                                                                                                                                                                                                                                                                                                                                                                   |
| Secondary Subject Heading:      | Patient-centred medicine, Genetics and genomics                                                                                                                                                                                                                                                                                                                                                                                                                                                                                                                                                                                                                                                                                                                                                                                                                                                                                                                                                                                                   |
| Keywords:                       | GENETICS, Inflammatory bowel disease < GASTROENTEROLOGY, Immunology < BASIC SCIENCES, Gastroenterology < INTERNAL MEDICINE, Clinical trials < THERAPEUTICS                                                                                                                                                                                                                                                                                                                                                                                                                                                                                                                                                                                                                                                                                                                                                                                                                                                                                        |
|                                 |                                                                                                                                                                                                                                                                                                                                                                                                                                                                                                                                                                                                                                                                                                                                                                                                                                                                                                                                                                                                                                                   |

SCHOLARONE™  
Manuscripts

1  
2  
3  
4 Predicting outcomes for Crohn's disease using a  
5 molecular biomarker (PROFILE): protocol for a multi-  
6 centre, randomised, biomarker-stratified trial  
7  
8  
9

10  
11 **Authors**

12  
13 Miles Parkes<sup>1\*†</sup>, Nurulamin M Noor<sup>1\*</sup>, Francis Dowling<sup>2</sup>, Harvey Leung<sup>2</sup>,  
14 Simon Bond<sup>2,3</sup>, Lynne Whitehead<sup>4</sup>, Sara Upponi<sup>5</sup>, Paul Kinnon<sup>6</sup>, Andrew P  
15 Sandham<sup>6</sup>, Paul A Lyons<sup>1,6</sup>, Eoin F McKinney<sup>1,6</sup>, Kenneth GC Smith<sup>1,6</sup>, James  
16 C Lee<sup>1†</sup>  
17

- 18  
19 1. Department of Medicine, University of Cambridge School of Clinical  
20 Medicine, Addenbrooke's Hospital, Cambridge, United Kingdom.  
21  
22 2. Cambridge Clinical Trials Unit, Coton House, Level 6, Cambridge  
23 University Hospitals NHS Foundation Trust, Cambridge, United Kingdom.  
24  
25 3. Medical Research Council Biostatistics Unit, Forvie Site, Robinson Way,  
26 Cambridge, United Kingdom.  
27  
28 4. Clinical Trials Pharmacy, Addenbrooke's Hospital, Cambridge, United  
29 Kingdom.  
30  
31 5. Department of Radiology, Addenbrooke's Hospital, Cambridge, United  
32 Kingdom.  
33  
34 6. PredictImmune Ltd., Maia Building 270, Babraham Research Campus,  
35 Cambridge, United Kingdom.  
36  
37  
38  
39  
40

41 \* These authors contributed equally

42 † Corresponding authors (MP: [miles.parkes@addenbrookes.nhs.uk](mailto:miles.parkes@addenbrookes.nhs.uk), JCL:  
43 [jcl65@cam.ac.uk](mailto:jcl65@cam.ac.uk))  
44  
45  
46  
47  
48  
49  
50  
51  
52  
53  
54  
55  
56  
57



## ABSTRACT

### Background

The course of Crohn's disease (CD) varies substantially between individuals, but reliable prognostic markers do not exist. This hinders disease management because patients with aggressive disease are undertreated by conventional "Step-Up" therapy (in which treatment is gradually escalated in response to refractory or relapsing disease) while those with more indolent disease would be exposed to unnecessary treatment-related toxicity if a more aggressive "Top-Down" approach were indiscriminately used. PROFILE will assess whether a prognostic transcriptional biomarker, that we have developed and validated, can improve clinical outcomes by facilitating personalized therapy in CD. This represents the first the biomarker-stratified trial in inflammatory bowel disease.

### Methods and analysis

This biomarker-stratified trial will compare the relative efficacy of "Top-Down" and "Accelerated Step-Up" therapy between biomarker-defined subgroups of patients with newly-diagnosed CD. 400 participants from ~50 UK centres will be recruited. Subjects within each biomarker subgroup (IBD<sup>hi</sup> or IBD<sup>lo</sup>) will be randomised (1:1) to receive one of the treatment strategies until trial completion (48 weeks). The primary outcome is the incidence of sustained surgery and steroid-free remission from completion of induction treatment through to week 48. Secondary outcomes include mucosal healing, quality of life assessments, and surrogate measures of disease burden including number of flares, cumulative steroid exposure, number of hospital admissions and number of Crohn's-related surgeries (assessed hierarchically). Analyses will compare the relative benefit of the treatment strategies in each biomarker-defined subgroup, powered as an interaction analysis, to determine whether the biomarker can accurately match patients to the most appropriate therapy.

### Ethics and dissemination

Ethical approval has been obtained and recruitment is underway at sites around the United Kingdom. Following trial completion and data analysis, the

1  
2  
3 results of the trial will be submitted for publication in peer-reviewed journals  
4 and presented at international conferences.  
5  
6

7 **Trial registration details:** ISRCTN: 11808228 (registered 3/11/2017).  
8  
9

10 [297/300]  
11  
12

13  
14 **Keywords**

15 Crohn's disease, trial, biomarker, personalised medicine, stratified  
16  
17  
18  
19  
20  
21  
22  
23  
24  
25  
26  
27  
28  
29  
30  
31  
32  
33  
34  
35  
36  
37  
38  
39  
40  
41  
42  
43  
44  
45  
46  
47  
48  
49  
50  
51  
52  
53  
54  
55  
56  
57  
58  
59  
60

## Article Summary

### Strengths and limitations of this study

- The first biomarker-stratified trial in inflammatory bowel disease, comparing the relative benefit of “Top-Down” over “Accelerated Step-Up” therapy in biomarker-defined subgroups of patients with newly diagnosed Crohn’s disease.
- The largest interventional trial ever conducted in adult patients with newly-diagnosed Crohn’s disease, incorporating 400 patients across approximately 50 sites.
- Findings have the potential to demonstrate that personalised therapy can be effectively delivered to patients with Crohn’s disease at the time of diagnosis using a blood-based prognostic biomarker.
- Study limited to the United Kingdom.
- Top-down therapy limited to treatment with infliximab and an immunomodulator (which may be superseded by other treatments in the future).

## Introduction

Crohn's disease (CD) is a relapsing-remitting form of inflammatory bowel disease (IBD) that can affect any part of the intestine, most commonly the ileum and/or colon. It is a common condition, affecting ~1 in 400-500 people in Northwestern Europe and North America, with a steadily rising global incidence.[1,2]

Like many other immune-mediated diseases, the course of CD varies substantially between affected individuals, but no reliable prognostic markers currently exist. The most common treatment strategy in CD is therefore based on a reactive, step-wise escalation in therapy that occurs in response to recurrent flares or persistently active disease. This approach (termed "Step-Up") should not over-treat patients but will inevitably expose some individuals to cumulative intestinal damage and disease-related complications while therapies that are insufficiently potent for them are trialled.

In 2008, it was shown that early use of anti-TNF $\alpha$  monoclonal antibodies (anti-TNF $\alpha$  therapy) was superior to conventional "Step-Up" management.[3] Further support for early anti-TNF $\alpha$  use came from registration trials, which demonstrated greater efficacy of anti-TNF $\alpha$  therapy when it was used earlier in the disease course;[4,5] and the SONIC trial, which showed that combining anti-TNF $\alpha$  (Infliximab) with Azathioprine (termed combination or "Top-Down" therapy) achieved results superior to either alone.[6] However, it is widely recognised that the indiscriminate use of combination therapy in all patients would expose those patients destined for mild disease to the risks and side-effects of treatment that their disease did not require, and would also be economically unfeasible.

In an attempt to reconcile these issues, subsequent trials have sought to identify approaches that could still deliver relatively early, aggressive therapy but also be economically feasible. The REACT trial, for example, investigated whether accelerating more quickly up the treatment ladder ("Accelerated Step-Up") would lead to better outcomes.[7] Similarly, the AZTEC and RAPID trials investigated whether initiating Azathioprine, a less potent but cheaper

1  
2  
3 immunomodulator, in all patients at diagnosis would improve outcomes.[8,9]  
4 However, none of these studies have demonstrated improved efficacy over  
5 standard care, leading many to conclude that a "precision" (or "personalised")  
6 approach would be required in which the most potent treatments are targeted  
7 to those who need them. Unfortunately, despite investigation into the  
8 prognostic utility of clinical, genetic and serological markers, there remain no  
9 well-validated prognostic tools for CD that can reliably predict the disease  
10 course from diagnosis. Indeed, a recent priority setting partnership group,  
11 tasked with identifying major areas of unmet need in IBD research,  
12 designated the need to develop markers to guide treatment for individual  
13 patients as the most important unmet need in IBD.[10] Consistent with this, a  
14 survey of 52 US and 50 UK gastroenterologists (commissioned through Apex  
15 Healthcare Consulting) showed that nearly all gastroenterologists recognised  
16 a need for an assay that could predict the clinical outcome and probability of  
17 relapse in CD (UK 98%, US 94%; Table 1). Moreover, if the results of such a  
18 biomarker enabled gastroenterologists to amend their treatment approach, all  
19 of the respondents would use the test in their practice (Table 1).  
20  
21  
22  
23  
24  
25  
26  
27  
28  
29  
30

31  
32 Our group has previously identified a gene expression signature in peripheral  
33 blood CD8+ T cells from patients with active, untreated IBD (and other  
34 autoimmune diseases) that is related to T cell exhaustion and which  
35 correlates with subsequent prognosis.[11–13] Patients in the IBD1 subgroup,  
36 defined by this signature, had a much more aggressive disease than those in  
37 the IBD2 subgroup, with earlier recurrence of disease and more flares over  
38 time.[11] To help translate this to routine clinical practice, we have since  
39 developed a whole blood qPCR assay that can identify patient subgroups  
40 which are analogous to those identified by the CD8 signature, but which does  
41 not require cell separation (manuscript in preparation). This assay has been  
42 independently prospectively validated in a cohort of 84 IBD patients from four  
43 centres around the UK.[14] We now propose to conduct a biomarker-stratified  
44 trial to determine whether this biomarker can facilitate the delivery of  
45 personalised medicine in CD and improve outcomes.  
46  
47  
48  
49  
50  
51  
52  
53  
54  
55

56 This manuscript summarises the approved PROFILE trial protocol that is in  
57

1  
2  
3 use at the time of publication (version 3.0, 30<sup>th</sup> April 2018). The full version of  
4 the protocol is available at:

5  
6 <http://www.crohnsprofiletrial.com/index.php/investigators/downloads/>.

7  
8  
9 The PROFILE trial participant information sheet (PIS) that is in use at the time  
10 of publication (version 3.1, 25<sup>th</sup> June 2018) is available at:

11  
12 <http://www.crohnsprofiletrial.com/index.php/participants/downloads/>.

13  
14  
15 Any future amendments to this protocol or participant information sheet will  
16 require agreement with the Sponsors and amendments will only be initiated  
17 following approval by a Research Ethics Committee (REC).  
18  
19  
20  
21  
22  
23  
24  
25  
26  
27  
28  
29  
30  
31  
32  
33  
34  
35  
36  
37  
38  
39  
40  
41  
42  
43  
44  
45  
46  
47  
48  
49  
50  
51  
52  
53  
54  
55  
56  
57  
58  
59  
60

|                                                                                                                                            | UK (n = 50)      | US (n = 52)      |
|--------------------------------------------------------------------------------------------------------------------------------------------|------------------|------------------|
| "CD patients are at moderate-to-high risk of relapse throughout their lives"                                                               | Agree – 80% (40) | Agree – 79% (41) |
| "There is a need for an assay that would predict clinical outcome and probability of relapse in CD"                                        | Agree - 98% (49) | Agree - 94% (49) |
| Would you use a test to predict clinical outcome and probability of relapse even if you could not change your treatment approach?          | Yes – 58% (29)   | Yes – 54% (28)   |
| Would you use a test to predict clinical outcome and probability of relapse if it enabled you to alter your treatment approach?            | Yes – 100% (50)  | Yes – 100% (52)  |
| How many days following a test to predict clinical outcome and probability of relapse would you require the results for this to be useful? | 10 days (mean)   | 9 days (mean)    |

**Table 1. Summary results of an independent 2015 survey of practising gastroenterologists performed by Apex Healthcare Consulting**

Gastroenterologists: Clinically active attending physicians (US) or consultants (UK) with 5-30 years specialty experience, including inflammatory bowel disease caseload. Survey funded by Wellcome Trust (Interim Translational Award 099450/Z/12/Z)

## Aims and objectives

The PROFILE trial will test whether stratification using a whole blood gene expression biomarker can facilitate personalised therapy in CD and improve clinical outcomes. The hypothesis is that the biomarker will identify individuals destined to run an aggressive, relapsing course, and that in these individuals a greater benefit of early “Top-Down” therapy will be observed. Similarly, we hypothesise that the biomarker will reliably identify those patients destined to experience more indolent disease, who can be effectively managed using conventional “Accelerated Step-Up” approaches without the risks and side-effects of unnecessary immunosuppression.

In addition, the trial will seek to advance scientific understanding of CD through the collection of a range of biological samples for future exploratory translational and scientific studies. These will include microbial, metabolomic, proteomic, genetic and transcriptomic samples.

## Methods and analysis

### *Trial design and flowchart*

The trial is designed as a randomised, biomarker-stratified trial to assess the relative benefit of different treatment approaches in biomarker-defined subgroups. This is an established design for the validation of predictive biomarkers,[15] and has been used widely in the setting of oncology trials.[16] Within each biomarker group, patients will be randomised in a 1:1 ratio to receive either “Top-Down” or Accelerated Step-Up” therapy (Figure 1).

### *Trial sites*

PROFILE is a multi-centre trial based in National Health Service hospitals within the UK. This trial aims to recruit 400 participants with newly diagnosed CD and will be conducted in approximately 50 sites (<http://www.crohnsprofiletrial.com/index.php/investigators/>).

### *Trial duration*

After providing informed consent, participants will be enrolled within the trial for 48 weeks following the baseline visit. There will be a total of 6 mandatory



1  
2  
3 trial visits, during which data will be collected. These will take place at the  
4 same timepoints for all participants and have been timed to coincide with  
5  
6  
7  
8  
9  
10  
11  
12  
13  
14  
15  
16  
17  
18  
19  
20  
21  
22  
23  
24  
25  
26  
27  
28  
29  
30  
31  
32  
33  
34  
35  
36  
37  
38  
39  
40  
41  
42  
43  
44  
45  
46  
47  
48  
49  
50  
51  
52  
53  
54  
55  
56  
57  
58  
59  
60

trial visits, during which data will be collected. These will take place at the same timepoints for all participants and have been timed to coincide with Infliximab infusion visits where possible (for those receiving “Top-Down” therapy). The end of the trial will be the last participant’s last visit.

### *Eligibility criteria*

Patients will be considered eligible for enrolment if they fulfil all of the inclusion criteria and meet none of the exclusion criteria (Box 1). The target population are patients with newly diagnosed, active CD who are immunomodulator and anti-TNF $\alpha$  treatment naïve.

### *Patient and Public Involvement*

The development and advancement of personalised medicine in CD represents a major goal for both patients and physicians, and was recently named one of the key research priorities in IBD by a priority setting partnership group, which included both patients and other key stakeholders.[10]

A local panel of CD patients at Cambridge University Hospitals NHS Trust was actively involved in the design of the study and development of study documentation, and feedback was also obtained by a broader panel of non-IBD patients convened by the Cambridge Clinical Trials Unit. Patient support groups (Crohn's and Colitis UK) were engaged during the conduct of the trial via invitation to investigator meetings, presentation to patient support groups, and publicity of the trial on their website and social media platforms. Both Crohn's and Colitis UK and trial participants have also contributed to the content of the trial website (<http://www.crohnsprofiletrial.com/index.php/participants>), although patients were not directly involved in the recruitment to, or conduct of, the trial.

Following trial completion and reporting, results of the trial will be disseminated in an easy-to-understand format to all trial participants and to Crohn's and Colitis UK, as well to the general public via press releases and the public engagement team at the University of Cambridge.

**Box 1 – Eligibility criteria for the PROFILE trial****Inclusion criteria**

Subjects meeting all of the criteria below may be included in the trial:

- CD diagnosed within 3 months using standard endoscopic, histologic or radiological criteria\*.
- Clinical evidence of active CD (corresponding to Harvey Bradshaw Index  $\geq$  7).
- Endoscopic evidence of at least moderately active CD (corresponding to SES-CD  $>$  6 or  $>$  4 if limited to the terminal ileum).
- C-reactive protein (CRP)  $>$  upper limit of normal on local assay or faecal calprotectin  $>$  200  $\mu$ g/g.
- Immunomodulator and anti-TNF $\alpha$  treatment naïve\*\*.
- Aged 16-80 years old.

\* Newly-diagnosed patchy colonic inflammation, initially diagnosed as indeterminate colitis, would meet inclusion criteria if clinical impression consistent with CD.

\*\* Patients need to have discontinued systemic corticosteroids for one week or more prior to screening assessments and still have ongoing, active disease.

**Exclusion criteria**

The presence of any of the following would preclude patient inclusion:

- Patients with ulcerative colitis.
- Patients with fistulating peri-anal CD or active perianal sepsis.
- Patients with obstructive symptoms and evidence of a fixed stricture on radiology or colonoscopy, which suggest that the subject is at high risk of requiring surgery over the following year.
- Patients with contra-indications to trial medications.
- Patients who are pregnant or breastfeeding at baseline.
- Other serious medical or psychiatric illness currently ongoing, or experienced in the last 3 months, that could compromise the trial.
- Patients unable to comply with protocol requirements (for reasons including alcohol and/or recreational drug abuse).

## *Outcome measures*

### Primary outcome

Incidence of sustained surgery and steroid-free remission from completion of induction treatment (a standard, 8 week course of oral steroids) through to week 48.\*

\*remission = Harvey-Bradshaw Index (HBI)  $\leq 4$ . Requirement for a course of systemic glucocorticoids for active CD would result in failure to meet the primary outcome measure.

### Secondary outcomes

1. Mucosal healing (assessed using simplified endoscopic score in CD [SES-CD])
2. Quality of life assessment (assessed using Inflammatory Bowel Disease Questionnaire [IBD-Q])
3. Assessment of cumulative disease burden based on:
  - i. Number of flares by 1 year.
  - ii. Cumulative glucocorticoid exposure by 1 year.
  - iii. Steroid-free remission by 1 year.
  - iv. Number of hospital admissions and CD surgeries by 1 year.

## *Health economic evaluation*

During the course of the trial there will be a local health economic analysis conducted by the Cambridge Centre for Health Services Research, as well as a national health economic analysis conducted by the National Institute for Health and Clinical Excellence (NICE). The findings of these health economic analyses will be disseminated alongside clinical trial findings.

## *Treatment assignment*

All patients considered eligible for the trial at the screening visit will have an 8 week reducing course of Prednisolone initiated for treatment of their active luminal Crohn's disease following screening assessments. Each will be assigned a unique participant ID number, for which a biomarker result will be returned. Anonymised data on all participants who are approached will be

1  
2  
3 collated in accordance with Consolidated Standards of Reporting Trials  
4 (CONSORT) guidelines. Following biomarker assessment, participants in  
5 each biomarker subgroup will be randomly assigned (1:1) to either "Top-  
6 Down" or "Accelerated Step-Up" therapy, using a computer-generated  
7 algorithm (Figure 1). This will occur within 14 days of screening (plus or minus  
8 5 days).  
9  
10  
11  
12  
13

14 As the trial is testing the ability of the biomarker to stratify therapy, rather than  
15 the efficacy of the individual medications (which are established treatments for  
16 CD), PROFILE has been designated a non-CTIMP trial (i.e. not a Clinical Trial  
17 of Investigational Medicine Product). All treatments will be open-label, but  
18 clinicians and participants will be blinded to biomarker subgroup designation.  
19  
20  
21  
22  
23

#### 24 *Treatment arms*

25 Following induction treatment with Prednisolone, patients will follow the  
26 treatment strategy to which they are randomised. These are:  
27  
28  
29

#### 30 "Accelerated Step-Up" therapy

- 31  
32 • Flare 1 (after induction therapy or if disease re-flares during induction  
33 therapy): Commence Azathioprine (2.5 mg/kg) OR low dose 6-  
34 Mercaptopurine with Allopurinol (if mild intolerance to azathioprine) OR  
35 Methotrexate (if severe intolerance to thiopurines or thiopurine  
36 methyltransferase [TPMT] null) together with a 12-week reducing  
37 course of Prednisolone.  
38
- 39 • Flare 2: Commence Infliximab. If sub-optimal response, then for  
40 Infliximab dose-escalation as outlined in the full trial protocol.  
41
- 42 • Flare 3+ (i.e. disease flare after Infliximab dose optimisation): 8 week  
43 reducing course of Prednisolone.  
44  
45  
46  
47  
48  
49

#### 50 "Top-Down" therapy

- 51  
52 • Infliximab started 2 weeks after randomisation with Azathioprine  
53 (2.5mg/kg) or alternative immunomodulator as described above. If sub-  
54 optimal response, then for Infliximab dose-escalation as described in  
55  
56  
57

1  
2  
3 the full trial protocol. The rate of weaning of Prednisolone should be  
4 accelerated once Infliximab is commenced to 10mg/week.  
5

- 6 • Subsequent disease flares (i.e. disease flare after Infliximab dose  
7 optimisation): 8 week reducing course of Prednisolone.  
8  
9

10  
11 Participants with persistent non-response to Infliximab can have early  
12 treatment termination and revert back to standard care, at the discretion of  
13 their local clinical team.  
14  
15

### 16 17 *Trial procedures & assessments*

18  
19 Newly-diagnosed patients with CD will be recruited from a predominantly  
20 outpatient setting. Potential trial patients will be identified by local clinical team  
21 members and be given a PIS prior to attending a screening visit. All  
22 participants must have had a colonoscopy before screening, where possible  
23 recorded for central reading. A Magnetic Resonance Enterography (MRE) to  
24 stage disease in accordance with European consensus guidelines[17] is also  
25 required but can be performed after trial entry.  
26  
27  
28  
29  
30  
31

32 Assessments, data collection and obtaining informed consent will be  
33 performed by appropriately trained research staff, as delegated by the  
34 Principal Investigator at each site. At trial visits, clinical data will be collected  
35 as well as samples for local and central processing – collection, evaluation  
36 and storage of these samples is outlined in the full trial protocol. Participants  
37 receiving Infliximab should have infusion visits aligned with trial visits, as  
38 shown in Figure 2, to reduce visit burden and the placebo effect associated  
39 with extra visits.[18] Following their final trial visit, participants will return to  
40 normal standard of care, according to local clinical practice.  
41  
42  
43  
44  
45  
46  
47

48 Only adverse events (AEs) that relate to CD, drug therapy for CD (sufficiently  
49 severe to require a change of treatment), or the biomarker sample collection  
50 will be recorded and assessed. Safety reporting and assessment of causality  
51 and expectedness of serious AEs (SAEs) will occur within standard timelines.  
52  
53 The trial sponsors will arrange insurance for negligent harm caused as a  
54 result of protocol design and for non-negligent harm arising through  
55  
56  
57

1  
2  
3 participation in the clinical trial.  
4  
5

### 6 *Sample size calculation*

7 We will recruit 400 participants into the PROFILE trial. This sample size was  
8 determined using a power calculation in which power was calculated by  
9 simulating 10,000 study designs and counting how many times a significant  
10 result was obtained. This was based on previously published remission rates  
11 for the primary endpoint,[3,7] the observed ratio of the IBD<sup>hi</sup>/IBD<sup>lo</sup> biomarker  
12 result in existing cohorts (1:1), and the observed remission rates in each of  
13 these cohorts.[14]  
14  
15  
16  
17  
18  
19

### 20 *Statistical procedures and data analysis plan*

21 The primary analysis is powered as an interaction analysis, where the  
22 interaction refers to the difference between the relative benefit of "Top-Down"  
23 over "Accelerated Step-Up" in each subgroup. This analytical strategy  
24 maximises the information available from each subgroup, and will determine  
25 whether the biomarker can accurately match patients to the most appropriate  
26 treatment strategy. Assuming an interaction of 0.3, a sample size of 346 will  
27 provide 90% power (estimated with 95% confidence intervals and tested at a  
28 2-tailed, 5% significance level). To allow for a ~13.5% drop out rate, 400  
29 participants will be recruited across approximately 50 sites. This will require  
30 recruitment of ~4 participants per site per year, which is a rate consistent with  
31 previous recruitment to Investigator-led IBD studies in the UK.[19]  
32 Recruitment began in December 2017.  
33  
34  
35  
36  
37  
38  
39  
40  
41  
42

43 To control for multiple testing, we will perform a closed testing procedure over  
44 the primary and 6 secondary endpoints, testing the biomarker-treatment  
45 interaction. A well-described methodology combining gate-keeping and Holm-  
46 Bonferroni methods in formal hypothesis testing will be used,[20] as outlined  
47 in Supplementary Figure 1. The secondary outcome measures will include an  
48 endoscopic assessment of mucosal healing (in addition to further analyses  
49 using MRE data), a quality of life assessment and a third outcome measure  
50 related to overall burden of disease (this hierarchically includes number of  
51 flares, cumulative steroid exposure, number of hospital admissions and  
52  
53  
54  
55  
56  
57  
58  
59  
60

1  
2  
3 number of Crohn's-related surgeries).

4  
5  
6 Mucosal healing has been associated with improved long-term outcomes in  
7 CD.[21,22] The use of central reading, in which the endoscopic images or  
8 video recordings are externally evaluated, has been further associated with a  
9 reduction in placebo response rates,[23] in part due to more stringent  
10 application of inclusion criteria and assessment of endoscopic response.[24]  
11 The PROFILE trial will utilise video recording of colonoscopy at the end of the  
12 trial period in all patients and at the outset in as many patients as possible,  
13 using the SES-CD,[25] a scoring tool that has been shown to have high inter-  
14 and intra-rater reliability.[26] To date, many trials using endoscopic endpoints  
15 have applied *post-hoc* analyses in small cohorts, resulting in limited power to  
16 detect effects.[27] In this respect, the PROFILE trial will be one of the largest  
17 trials to analyse mucosal healing routinely and the first to do so in the setting  
18 of adults with CD treated with "Top-Down" therapy from diagnosis.  
19  
20  
21  
22  
23  
24  
25  
26  
27

28  
29 An MRE will be performed at the end of the trial period in all patients. There is  
30 increasing interest in the use of MRE as a measure of disease activity in  
31 clinical trials, with the development of imaging scores such as the Magnetic  
32 Resonance Index of Activity (MaRIA).[28,29] This, and other similar scores,  
33 have often been validated and refined in relatively small cohorts [30] and none  
34 are in routine clinical use. With 400 participants, the PROFILE trial will enable  
35 further evaluation of the MaRIA score both in terms of confirming treatment  
36 response and as an evaluative index.[31]  
37  
38  
39  
40  
41  
42

43 Quality of life assessments will be performed over repeated visits and will be  
44 analysed using a mixed effect repeat measure analysis with a clustered  
45 patient-level residual error with unstructured covariance over visits, fixed  
46 effects for visit, and all other covariates assumed to have a constant fixed  
47 effect over time.  
48  
49  
50  
51

52  
53 It is anticipated that future data collection will also take place following  
54 completion of treatment to assess disease burden and the longer-term impact  
55  
56  
57

1  
2  
3 of “Top-Down” vs. “Accelerated Step-Up” treatment approaches on  
4 subsequent disease course for these patients.  
5  
6  
7

### 8 **Conclusions**

9 Currently there is a clear unmet need in the management of IBD, in that  
10 treatment strategies – whatever they may be – are typically applied in a one-  
11 size-fits-all manner or using “prognostic” markers that have not been shown to  
12 be able to guide therapy.  
13  
14  
15

16  
17 The PROFILE trial is the first biomarker-stratified trial in IBD and will  
18 investigate whether a blood-based biomarker, assessed at diagnosis, can  
19 stratify patients with CD to receive therapy that is appropriately matched to  
20 their subsequent disease course.  
21  
22  
23

24  
25 If stratification by IBD<sup>hi</sup>/IBD<sup>lo</sup> status is demonstrated to improve clinical  
26 outcomes by appropriately identifying those patients who require “Top-Down”  
27 therapy and those who can be safely managed with “Accelerated Step-Up”  
28 therapy, this would represent a step-change in the management of CD and  
29 would help make personalised medicine a reality for patients.  
30  
31  
32  
33

### 34 **Ethics and dissemination**

35  
36 The trial protocol was approved by the East of England - Cambridge South  
37 Research Ethics Committee (Ref: 17/EE/03/82). Recruitment for the PROFILE  
38 trial began in December 2017 and is currently ongoing at sites around the  
39 United Kingdom. On completion of the trial, the data will be analysed and  
40 tabulated and a final trial report prepared. Following trial completion and  
41 analysis, the results will be presented at scientific meetings and submitted for  
42 publication in a peer-reviewed journal. Press releases will be prepared to  
43 accompany publication of this trial in order to share the results more widely  
44 with the global medical community, trial participants and patient support  
45 groups. Reasonable applications for individual clinical trial participant-level  
46 data will be considered by the trial team and shared on a controlled access  
47 basis if approved. Authorship of final trial outputs will be assigned in  
48  
49  
50  
51  
52  
53  
54  
55  
56  
57  
58  
59  
60



1  
2  
3 accordance with guidelines set out by the International Committee of Medical  
4 Journal Editors. The SPIRIT reporting guidelines have been used in  
5 preparation of this article.[32]  
6  
7  
8  
9  
10  
11  
12  
13  
14  
15  
16  
17  
18  
19  
20  
21  
22  
23  
24  
25  
26  
27  
28  
29  
30  
31  
32  
33  
34  
35  
36  
37  
38  
39  
40  
41  
42  
43  
44  
45  
46  
47  
48  
49  
50  
51  
52  
53  
54  
55  
56  
57  
58  
59  
60

For peer review only

## References

- 1 Kaplan GG, Ng SC. Understanding and Preventing the Global Increase of Inflammatory Bowel Disease. *Gastroenterology* 2017;**152**:313–321.e2. doi:10.1053/j.gastro.2016.10.020
- 2 Ng SC, Shi HY, Hamidi N, *et al.* Worldwide incidence and prevalence of inflammatory bowel disease in the 21st century: a systematic review of population-based studies. *Lancet* 2017;**390**:2769–78. doi:10.1016/S0140-6736(17)32448-0
- 3 D'Haens G, Baert F, van Assche G, *et al.* Early combined immunosuppression or conventional management in patients with newly diagnosed Crohn's disease: an open randomised trial. *Lancet* 2008;**371**:660–7. doi:10.1016/S0140-6736(08)60304-9
- 4 Schreiber S, Reinisch W, Colombel JF, *et al.* Subgroup analysis of the placebo-controlled CHARM trial: Increased remission rates through 3years for adalimumab-treated patients with early Crohn's disease. *J Crohn's Colitis* 2013;**7**:213–21. doi:10.1016/j.crohns.2012.05.015
- 5 Hanauer SB, Feagan BG, Lichtenstein GR, *et al.* Maintenance infliximab for Crohn's disease: The ACCENT I randomised trial. *Lancet* 2002;**359**:1541–9. doi:10.1016/S0140-6736(02)08512-4
- 6 Colombel JF, Sandborn WJ, Reinisch W, *et al.* Infliximab, azathioprine, or combination therapy for Crohn's disease. *N Engl J Med* 2010;**362**:1383–95. doi:10.1056/NEJMoa0904492
- 7 Khanna R, Bressler B, Levesque BG, *et al.* Early combined immunosuppression for the management of Crohn's disease (REACT): A cluster randomised controlled trial. *Lancet* 2015;**386**:1825–34. doi:10.1016/S0140-6736(15)00068-9
- 8 Sans M, Román AL, Esteve M, *et al.* Early Use of Azathioprine Has a Steroid Sparing Effect on Recently Diagnosed Crohn's Disease Patients. *Gastroenterology* 2011;**140**:S-109. doi:10.1016/S0016-5085(11)60441-1
- 9 Cosnes J, Bourrier A, Laharie D, *et al.* Early administration of azathioprine vs conventional management of Crohn's Disease: a randomized controlled trial. *Gastroenterology* 2013;**145**:758–65.

- 1  
2  
3 doi:10.1053/j.gastro.2013.04.048  
4  
5 10 Hart AL, Lomer M, Verjee A, *et al.* What are the top 10 research  
6 questions in the treatment of inflammatory bowel disease? *J Crohn's*  
7 *Colitis* 2017;**11**:204–11. doi:10.1093/ecco-jcc/jjw144  
8  
9 11 Lee JC, Lyons PA, McKinney EF, *et al.* Gene expression profiling of  
10 CD8+ T cells predicts prognosis in patients with Crohn disease and  
11 ulcerative colitis. *J Clin Invest* 2011;**121**:4170–9.  
12 doi:10.1172/JCI59255DS1  
13  
14 12 McKinney EF, Lyons PA, Carr EJ, *et al.* A CD8+T cell transcription  
15 signature predicts prognosis in autoimmune disease. *Nat Med*  
16 2010;**16**:586–91. doi:10.1038/nm.2130  
17  
18 13 McKinney EF, Lee JC, Jayne DRW, *et al.* T-cell exhaustion, co-  
19 stimulation and clinical outcome in autoimmunity and infection. *Nature*  
20 2015;**523**:612–6. doi:10.1038/nature14468  
21  
22 14 Lee J, Biasci D, Noor N, *et al.* PROFILE trial: predicting outcomes for  
23 Crohn's disease using a molecular biomarker. *Gut* 2017;**66**:A22–3.  
24 doi:10.1136/gutjnl-2017-314472.44  
25  
26 15 Freidlin B, McShane LM, Korn EL. Randomized clinical trials with  
27 biomarkers: Design issues. *J. Natl. Cancer Inst.* 2010;**102**:152–60.  
28 doi:10.1093/jnci/djp477  
29  
30 16 Potti A, Mukherjee S, Petersen R, *et al.* A Genomic Strategy to Refine  
31 Prognosis in Early-Stage Non-Small-Cell Lung Cancer. *N Engl J Med*  
32 2006;**355**:570–80. doi:10.1056/NEJMoa060467  
33  
34 17 Gomollón F, Dignass A, Annese V, *et al.* 3rd European evidence-based  
35 consensus on the diagnosis and management of Crohn's disease 2016:  
36 Part 1: Diagnosis and medical management. *J Crohn's Colitis*  
37 2017;**11**:3–25. doi:10.1093/ecco-jcc/jjw168  
38  
39 18 Su C, Lewis JD, Goldberg B, *et al.* A Meta-Analysis of the Placebo  
40 Rates of Remission and Response in Clinical Trials of Active Ulcerative  
41 Colitis. *Gastroenterology* 2007;**132**:516–26.  
42 doi:10.1053/j.gastro.2006.12.037  
43  
44 19 Heap GA, Weedon MN, Bewshea CM, *et al.* HLA-DQA1-HLA-DRB1  
45 variants confer susceptibility to pancreatitis induced by thiopurine  
46 immunosuppressants. *Nat Genet* 2014;**46**:1131–4. doi:10.1038/ng.3093  
47  
48  
49  
50  
51  
52  
53  
54  
55  
56  
57  
58  
59  
60

- 1  
2  
3 20 Bretz F, Maurer W, Brannath W, *et al.* A graphical approach to  
4 sequentially rejective multiple test procedures. *Stat Med* 2009;**28**:586–  
5 604. doi:10.1002/sim.3495  
6  
7  
8 21 Rutgeerts P, Van Assche G, Sandborn WJ, *et al.* Adalimumab induces  
9 and maintains mucosal healing in patients with Crohn's disease: Data  
10 from the EXTEND trial. *Inflamm Bowel Dis* 2012;**142**:1102–1111.  
11 doi:10.1053/j.gastro.2012.01.035  
12  
13  
14 22 Baert F, Moortgat L, Van Assche G, *et al.* Mucosal Healing Predicts  
15 Sustained Clinical Remission in Patients With Early-Stage Crohn's  
16 Disease. *Gastroenterology* 2010;**138**:463–8.  
17 doi:10.1053/j.gastro.2009.09.056  
18  
19  
20 23 Feagan BG, Sandborn WJ, D'Haens G, *et al.* The role of centralized  
21 reading of endoscopy in a randomized controlled trial of mesalamine for  
22 ulcerative colitis. *Gastroenterology* 2013;**145**.  
23 doi:10.1053/j.gastro.2013.03.025  
24  
25  
26 24 Feagan B, Sandborn WJ, Rutgeerts P, *et al.* Performance of Crohn's  
27 disease Clinical Trial Endpoints based upon Different Cutoffs for Patient  
28 Reported Outcomes or Endoscopic Activity: Analysis of EXTEND Data.  
29 *Inflamm Bowel Dis* 2018;**00**:1–11. doi:10.1093/ibd/izx082  
30  
31  
32 25 Daperno M, D'Haens G, Van Assche G, *et al.* Development and  
33 validation of a new, simplified endoscopic activity score for Crohn's  
34 disease: The SES-CD. *Gastrointest Endosc* 2004;**60**:505–12.  
35 doi:10.1016/S0016-5107(04)01878-4  
36  
37  
38 26 Khanna R, Zou G, D'Haens G, *et al.* Reliability among central readers in  
39 the evaluation of endoscopic findings from patients with Crohn's  
40 disease. *Gut* 2016;**65**:1119–25. doi:10.1136/gutjnl-2014-308973  
41  
42  
43 27 Reinisch W, Colombel JF, D'Haens G, *et al.* Characterisation of  
44 mucosal healing with adalimumab treatment in patients with moderately  
45 to severely active Crohn's disease: Results from the EXTEND trial. *J*  
46 *Crohn's Colitis* 2017;**11**:425–34. doi:10.1093/ecco-jcc/jjw178  
47  
48  
49 28 Rimola J, Rodriguez S, García-Bosch O, *et al.* Magnetic resonance for  
50 assessment of disease activity and severity in ileocolonic Crohn's  
51 disease. *Gut* 2009;**58**:1113–20. doi:10.1136/gut.2008.167957  
52  
53  
54 29 Rimola J, Ordás I, Rodriguez S, *et al.* Magnetic resonance imaging for  
55  
56  
57  
58  
59  
60

- 1  
2  
3 evaluation of Crohn's disease: Validation of parameters of severity and  
4 quantitative index of activity. *Inflamm Bowel Dis* 2011;**17**:1759–68.  
5 doi:10.1002/ibd.21551  
6  
7  
8 30 Ordás I, Rimola J, Rodríguez S, *et al*. Accuracy of magnetic resonance  
9 enterography in assessing response to therapy and mucosal healing in  
10 patients with Crohn's disease. *Gastroenterology* 2014;**146**.  
11 doi:10.1053/j.gastro.2013.10.055  
12  
13  
14 31 Jairath V, Ordas I, Zou G, *et al*. Reliability of Measuring Ileo-Colonic  
15 Disease Activity in Crohn's Disease by Magnetic Resonance  
16 Enterography. *Inflamm Bowel Dis* 2018;**24**:440–9.  
17 doi:10.1093/ibd/izx040  
18  
19  
20 32 Chan AW, Tetzlaff JM, Altman DG, *et al*. SPIRIT 2013 statement:  
21 Defining standard protocol items for clinical trials. *Ann. Intern. Med.*  
22 2013;**158**:200–7. doi:10.7326/0003-4819-158-3-201302050-00583  
23  
24  
25  
26  
27  
28  
29  
30  
31  
32  
33  
34  
35  
36  
37  
38  
39  
40  
41  
42  
43  
44  
45  
46  
47  
48  
49  
50  
51  
52  
53  
54  
55  
56  
57  
58  
59  
60

1  
2  
3 **Author statement:** MP, NMN, FD, KGCS and JCL wrote the full trial protocol.  
4 HL, PK, and APS reviewed and edited draft versions of the protocol. The  
5 Statistics and Data Analysis sections of the trial protocol were written by SB.  
6 LW contributed to the Trial Treatment section of the protocol, and SU  
7 contributed to the Radiology section. PAL, EFM, MP, KGCS and JCL were the  
8 initiators of this trial. All authors took part in reading and final approval of the  
9 manuscript.  
10  
11  
12  
13  
14

15  
16 **Acknowledgements:** We are grateful for input and assistance from Carrie  
17 Bayliss (Cambridge Clinical Trials Unit) and Dr Amanda Wooding (Cambridge  
18 Enterprise) in securing funding for this trial, and to Dr Adrian Mander, Prof  
19 Robert Gray, Prof Geert D'Haens, Prof Severine Vermeire, Dr Sharon  
20 O'Byrne, Prof Subrata Ghosh, Dr Nick Carroll and Dr Ed Godfrey for helpful  
21 discussion regarding the protocol. We are grateful to the patients who  
22 provided feedback on the study design and documentation. The protocol has  
23 been peer reviewed by the British Society of Gastroenterology IBD Clinical  
24 Research Group (BSG IBD CRG). Details of participating centres can be  
25 found at <http://www.crohnsprofiletrial.com/index.php/investigators/>. KGCS is a  
26 Wellcome Investigator and an NIHR Senior Investigator. EFM and JCL are  
27 supported by Wellcome Trust Intermediate Clinical Fellowships  
28 (104064/Z/14/Z and 105920/Z/14/Z respectively).  
29  
30  
31  
32  
33  
34  
35  
36  
37

38 **Patient records:** Data are collected via a paper CRF, provided by the trial co-  
39 ordination team, and after being input electronically, will be stored in a  
40 secured database. Participants will only be identifiable by a trial-specific  
41 number in the database. Essential documents will be retained until at least 15  
42 years after the publication of the clinical trial report.  
43  
44  
45  
46  
47

48 **Trial committees:** The unblinded data will be presented to the Data  
49 Monitoring Committee, who will meet on a regular basis throughout the trial  
50 and who are independent from the sponsor. The Data Monitoring Committee  
51 will then prepare a report for the Trial Steering Committee who will provide  
52 overall supervision of the trial.  
53  
54  
55  
56  
57

1  
2  
3 **Funding:** This trial is funded by the Wellcome Trust via an investment in  
4 PredictImmune (200448/Z/16/Z). The Apex Healthcare Consulting survey and  
5 biomarker development work described herein was funded by a Wellcome  
6 Trust Interim Translational Award (099450/Z/12/Z). The trial is co-sponsored  
7 by Cambridge University Hospitals NHS Foundation Trust and University of  
8 Cambridge. The sponsors are not involved in study design; collection,  
9 management, analysis, and interpretation of data; writing of the report; and  
10 the decision to submit the report for publication.  
11  
12  
13  
14  
15

16  
17 **Competing interests statement:** PAL, EFM, KGCS and JCL are co-  
18 inventors on a patent covering the method of assessing prognosis in IBD.  
19 PAL, EFM, and KGCS are co-founders and consultants for PredictImmune.  
20 PK and APS are employees of PredictImmune. JCL is a consultant for  
21 PredictImmune.  
22  
23  
24  
25

26  
27 **Word count:** 3281/4000  
28  
29  
30  
31  
32  
33  
34  
35  
36  
37  
38  
39  
40  
41  
42  
43  
44  
45  
46  
47  
48  
49  
50  
51  
52  
53  
54  
55  
56  
57  
58  
59  
60

## Figure legends

### Figure 1 – Trial Design

Following biomarker stratification, patients will be randomised in a 1:1 fashion to either “Top-Down” or “Accelerated Step-Up” treatment arms.

### Figure 2 – Trial visits for participants.

Patients randomised to “Accelerated Step-Up” will have a total of 5 further trial visits after their initial screening visit. Participants randomised to the “Top-Down” group will be started on Infliximab at week 2. All further Infliximab infusion visits should be aligned to scheduled trial visits wherever possible in order to minimise visit burden for participants. Participants in the “Top-Down” group will also have 5 trial visits and will also attend hospital an additional 4 times for infliximab infusions. Randomisation occurs at week 0.



Figure 1. Biomarker stratified trial design



Figure 1 – Trial Design

Following biomarker stratification, patients will be randomised in a 1:1 fashion to either “Top-Down” or “Accelerated Step-Up” treatment arms.

213x124mm (300 x 300 DPI)

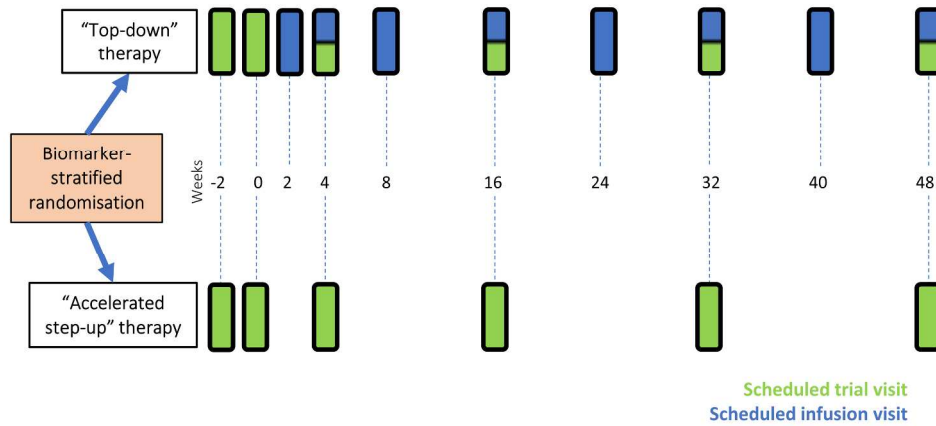

Figure 2 – Trial visits for participants.

Patients randomised to “Accelerated Step-Up” will have a total of 5 further trial visits after their initial screening visit. Participants randomised to the “Top-Down” group will be started on Infliximab at week 2. All further Infliximab infusion visits should be aligned to scheduled trial visits wherever possible in order to minimise visit burden for participants. Participants in the “Top-Down” group will also have 5 trial visits and will also attend hospital an additional 4 times for infliximab infusions. Randomisation occurs at week 0.

125x89mm (600 x 600 DPI)

only

Supplementary Material



**Supplementary Figure 1 – Statistical approach for the PROFILE trial.**

The methodology will combine together gate-keeping and Holm-Bonferroni methods in formal hypothesis testing, with the above diagram defining how the significance levels will be transitioned assuming an initial configuration of 5% at the primary endpoint (relapse-free remission) and 0% on all other tests. All the secondary endpoints are continuous variables and will be analysed using a linear regression framework adjusting for baseline covariates.

# Reporting checklist for protocol of a clinical trial.

Based on the SPIRIT guidelines.

## Instructions to authors

Complete this checklist by entering the page numbers from your manuscript where readers will find each of the items listed below.

Your article may not currently address all the items on the checklist. Please modify your text to include the missing information. If you are certain that an item does not apply, please write "n/a" and provide a short explanation.

Upload your completed checklist as an extra file when you submit to a journal.

In your methods section, say that you used the SPIRIT reporting guidelines, and cite them as:

Chan A-W, Tetzlaff JM, Altman DG, Laupacis A, Gøtzsche PC, Krleža-Jerić K, Hróbjartsson A, Mann H, Dickersin K, Berlin J, Doré C, Parulekar W, Summerskill W, Groves T, Schulz K, Sox H, Rockhold FW, Rennie D, Moher D. SPIRIT 2013 Statement: Defining standard protocol items for clinical trials. *Ann Intern Med.* 2013;158(3):200-207

|                              |                     | Reporting Item                                                                                               | Page Number                                                                                                                                                                                                                    |
|------------------------------|---------------------|--------------------------------------------------------------------------------------------------------------|--------------------------------------------------------------------------------------------------------------------------------------------------------------------------------------------------------------------------------|
| Title                        | <a href="#">#1</a>  | Descriptive title identifying the study design, population, interventions, and, if applicable, trial acronym | 1                                                                                                                                                                                                                              |
| Trial registration           | <a href="#">#2a</a> | Trial identifier and registry name. If not yet registered, name of intended registry                         | 3                                                                                                                                                                                                                              |
| Trial registration: data set | <a href="#">#2b</a> | All items from the World Health Organization Trial Registration Data Set                                     | 1 (contacts, title), 2 (registration details, countries of recruitment, disease, intervention, study type, sample size, primary and secondary outcomes), 11 (inclusion / exclusion criteria), 17 (ethics review), 24 (sponsor) |
| Protocol version             | <a href="#">#3</a>  | Date and version identifier                                                                                  | 7                                                                                                                                                                                                                              |

|    |                                                         |                     |                                                                                                                                                                                                                                                                                          |       |
|----|---------------------------------------------------------|---------------------|------------------------------------------------------------------------------------------------------------------------------------------------------------------------------------------------------------------------------------------------------------------------------------------|-------|
| 1  | Funding                                                 | <a href="#">#4</a>  | Sources and types of financial, material, and other support                                                                                                                                                                                                                              | 22-23 |
| 2  |                                                         |                     |                                                                                                                                                                                                                                                                                          |       |
| 3  |                                                         |                     |                                                                                                                                                                                                                                                                                          |       |
| 4  | Roles and responsibilities: contributorship             | <a href="#">#5a</a> | Names, affiliations, and roles of protocol contributors                                                                                                                                                                                                                                  | 22    |
| 5  |                                                         |                     |                                                                                                                                                                                                                                                                                          |       |
| 6  |                                                         |                     |                                                                                                                                                                                                                                                                                          |       |
| 7  |                                                         |                     |                                                                                                                                                                                                                                                                                          |       |
| 8  |                                                         |                     |                                                                                                                                                                                                                                                                                          |       |
| 9  |                                                         |                     |                                                                                                                                                                                                                                                                                          |       |
| 10 | Roles and responsibilities: sponsor contact information | <a href="#">#5b</a> | Name and contact information for the trial sponsor                                                                                                                                                                                                                                       | 23    |
| 11 |                                                         |                     |                                                                                                                                                                                                                                                                                          |       |
| 12 |                                                         |                     |                                                                                                                                                                                                                                                                                          |       |
| 13 |                                                         |                     |                                                                                                                                                                                                                                                                                          |       |
| 14 |                                                         |                     |                                                                                                                                                                                                                                                                                          |       |
| 15 |                                                         |                     |                                                                                                                                                                                                                                                                                          |       |
| 16 |                                                         |                     |                                                                                                                                                                                                                                                                                          |       |
| 17 | Roles and responsibilities: sponsor and funder          | <a href="#">#5c</a> | Role of study sponsor and funders, if any, in study design; collection, management, analysis, and interpretation of data; writing of the report; and the decision to submit the report for publication, including whether they will have ultimate authority over any of these activities | 23    |
| 18 |                                                         |                     |                                                                                                                                                                                                                                                                                          |       |
| 19 |                                                         |                     |                                                                                                                                                                                                                                                                                          |       |
| 20 |                                                         |                     |                                                                                                                                                                                                                                                                                          |       |
| 21 |                                                         |                     |                                                                                                                                                                                                                                                                                          |       |
| 22 |                                                         |                     |                                                                                                                                                                                                                                                                                          |       |
| 23 |                                                         |                     |                                                                                                                                                                                                                                                                                          |       |
| 24 |                                                         |                     |                                                                                                                                                                                                                                                                                          |       |
| 25 |                                                         |                     |                                                                                                                                                                                                                                                                                          |       |
| 26 |                                                         |                     |                                                                                                                                                                                                                                                                                          |       |
| 27 |                                                         |                     |                                                                                                                                                                                                                                                                                          |       |
| 28 |                                                         |                     |                                                                                                                                                                                                                                                                                          |       |
| 29 |                                                         |                     |                                                                                                                                                                                                                                                                                          |       |
| 30 | Roles and responsibilities: committees                  | <a href="#">#5d</a> | Composition, roles, and responsibilities of the coordinating centre, steering committee, endpoint adjudication committee, data management team, and other individuals or groups overseeing the trial, if applicable (see Item 21a for data monitoring committee)                         | 22    |
| 31 |                                                         |                     |                                                                                                                                                                                                                                                                                          |       |
| 32 |                                                         |                     |                                                                                                                                                                                                                                                                                          |       |
| 33 |                                                         |                     |                                                                                                                                                                                                                                                                                          |       |
| 34 |                                                         |                     |                                                                                                                                                                                                                                                                                          |       |
| 35 |                                                         |                     |                                                                                                                                                                                                                                                                                          |       |
| 36 |                                                         |                     |                                                                                                                                                                                                                                                                                          |       |
| 37 |                                                         |                     |                                                                                                                                                                                                                                                                                          |       |
| 38 |                                                         |                     |                                                                                                                                                                                                                                                                                          |       |
| 39 |                                                         |                     |                                                                                                                                                                                                                                                                                          |       |
| 40 |                                                         |                     |                                                                                                                                                                                                                                                                                          |       |
| 41 | Background and rationale                                | <a href="#">#6a</a> | Description of research question and justification for undertaking the trial, including summary of relevant studies (published and unpublished) examining benefits and harms for each intervention                                                                                       | 5-7   |
| 42 |                                                         |                     |                                                                                                                                                                                                                                                                                          |       |
| 43 |                                                         |                     |                                                                                                                                                                                                                                                                                          |       |
| 44 |                                                         |                     |                                                                                                                                                                                                                                                                                          |       |
| 45 |                                                         |                     |                                                                                                                                                                                                                                                                                          |       |
| 46 |                                                         |                     |                                                                                                                                                                                                                                                                                          |       |
| 47 |                                                         |                     |                                                                                                                                                                                                                                                                                          |       |
| 48 |                                                         |                     |                                                                                                                                                                                                                                                                                          |       |
| 49 | Background and rationale: choice of comparators         | <a href="#">#6b</a> | Explanation for choice of comparators                                                                                                                                                                                                                                                    | 5-7   |
| 50 |                                                         |                     |                                                                                                                                                                                                                                                                                          |       |
| 51 |                                                         |                     |                                                                                                                                                                                                                                                                                          |       |
| 52 |                                                         |                     |                                                                                                                                                                                                                                                                                          |       |
| 53 |                                                         |                     |                                                                                                                                                                                                                                                                                          |       |
| 54 | Objectives                                              | <a href="#">#7</a>  | Specific objectives or hypotheses                                                                                                                                                                                                                                                        | 9     |
| 55 |                                                         |                     |                                                                                                                                                                                                                                                                                          |       |
| 56 |                                                         |                     |                                                                                                                                                                                                                                                                                          |       |
| 57 | Trial design                                            | <a href="#">#8</a>  | Description of trial design including type of trial (eg, parallel group, crossover,                                                                                                                                                                                                      | 9     |
| 58 |                                                         |                     |                                                                                                                                                                                                                                                                                          |       |
| 59 |                                                         |                     |                                                                                                                                                                                                                                                                                          |       |
| 60 |                                                         |                     |                                                                                                                                                                                                                                                                                          |       |

|    |                      |                                                              |       |
|----|----------------------|--------------------------------------------------------------|-------|
| 1  |                      | factorial, single group), allocation ratio,                  |       |
| 2  |                      | and framework (eg, superiority,                              |       |
| 3  |                      | equivalence, non-inferiority, exploratory)                   |       |
| 4  |                      |                                                              |       |
| 5  | Study setting        | <a href="#">#9</a> Description of study settings (eg,        | 9     |
| 6  |                      | community clinic, academic hospital) and                     |       |
| 7  |                      | list of countries where data will be                         |       |
| 8  |                      | collected. Reference to where list of                        |       |
| 9  |                      | study sites can be obtained                                  |       |
| 10 |                      |                                                              |       |
| 11 | Eligibility criteria | <a href="#">#10</a> Inclusion and exclusion criteria for     | 11    |
| 12 |                      | participants. If applicable, eligibility                     |       |
| 13 |                      | criteria for study centres and individuals                   |       |
| 14 |                      | who will perform the interventions (eg,                      |       |
| 15 |                      | surgeons, psychotherapists)                                  |       |
| 16 |                      |                                                              |       |
| 17 | Interventions:       | <a href="#">#11a</a> Interventions for each group with       | 13-14 |
| 18 | description          | sufficient detail to allow replication,                      |       |
| 19 |                      | including how and when they will be                          |       |
| 20 |                      | administered                                                 |       |
| 21 |                      |                                                              |       |
| 22 | Interventions:       | <a href="#">#11b</a> Criteria for discontinuing or modifying | 13-14 |
| 23 | modifications        | allocated interventions for a given trial                    |       |
| 24 |                      | participant (eg, drug dose change in                         |       |
| 25 |                      | response to harms, participant request,                      |       |
| 26 |                      | or improving / worsening disease)                            |       |
| 27 |                      |                                                              |       |
| 28 | Interventions:       | <a href="#">#11c</a> Strategies to improve adherence to      | 14    |
| 29 | adherence            | intervention protocols, and any                              |       |
| 30 |                      | procedures for monitoring adherence                          |       |
| 31 |                      | (eg, drug tablet return; laboratory tests)                   |       |
| 32 |                      |                                                              |       |
| 33 | Interventions:       | <a href="#">#11d</a> Relevant concomitant care and           | 13    |
| 34 | concomitant care     | interventions that are permitted or                          |       |
| 35 |                      | prohibited during the trial                                  |       |
| 36 |                      |                                                              |       |
| 37 | Outcomes             | <a href="#">#12</a> Primary, secondary, and other outcomes,  | 12    |
| 38 |                      | including the specific measurement                           |       |
| 39 |                      | variable (eg, systolic blood pressure),                      |       |
| 40 |                      | analysis metric (eg, change from                             |       |
| 41 |                      | baseline, final value, time to event),                       |       |
| 42 |                      | method of aggregation (eg, median,                           |       |
| 43 |                      | proportion), and time point for each                         |       |
| 44 |                      |                                                              |       |
| 45 |                      |                                                              |       |
| 46 |                      |                                                              |       |
| 47 |                      |                                                              |       |
| 48 |                      |                                                              |       |
| 49 |                      |                                                              |       |
| 50 |                      |                                                              |       |
| 51 |                      |                                                              |       |
| 52 |                      |                                                              |       |
| 53 |                      |                                                              |       |
| 54 |                      |                                                              |       |
| 55 |                      |                                                              |       |
| 56 |                      |                                                              |       |
| 57 |                      |                                                              |       |
| 58 |                      |                                                              |       |
| 59 |                      |                                                              |       |
| 60 |                      |                                                              |       |

outcome. Explanation of the clinical relevance of chosen efficacy and harm outcomes is strongly recommended

|    |                    |                      |                                              |
|----|--------------------|----------------------|----------------------------------------------|
| 1  |                    |                      |                                              |
| 2  |                    |                      |                                              |
| 3  |                    |                      |                                              |
| 4  |                    |                      |                                              |
| 5  | Participant        | <a href="#">#13</a>  | Time schedule of enrolment, Fig.2            |
| 6  | timeline           |                      |                                              |
| 7  |                    |                      | interventions (including any run-ins and     |
| 8  |                    |                      | washouts), assessments, and visits for       |
| 9  |                    |                      | participants. A schematic diagram is         |
| 10 |                    |                      | highly recommended (see Figure)              |
| 11 |                    |                      |                                              |
| 12 |                    |                      |                                              |
| 13 |                    |                      |                                              |
| 14 | Sample size        | <a href="#">#14</a>  | Estimated number of participants needed 9,15 |
| 15 |                    |                      | to achieve study objectives and how it       |
| 16 |                    |                      | was determined, including clinical and       |
| 17 |                    |                      | statistical assumptions supporting any       |
| 18 |                    |                      | sample size calculations                     |
| 19 |                    |                      |                                              |
| 20 |                    |                      |                                              |
| 21 |                    |                      |                                              |
| 22 | Recruitment        | <a href="#">#15</a>  | Strategies for achieving adequate 9          |
| 23 |                    |                      | participant enrolment to reach target        |
| 24 |                    |                      | sample size                                  |
| 25 |                    |                      |                                              |
| 26 |                    |                      |                                              |
| 27 | Allocation:        | <a href="#">#16a</a> | Method of generating the allocation 12-13    |
| 28 | sequence           |                      | sequence (eg, computer-generated             |
| 29 | generation         |                      | random numbers), and list of any factors     |
| 30 |                    |                      | for stratification. To reduce predictability |
| 31 |                    |                      | of a random sequence, details of any         |
| 32 |                    |                      | planned restriction (eg, blocking) should    |
| 33 |                    |                      | be provided in a separate document that      |
| 34 |                    |                      | is unavailable to those who enrol            |
| 35 |                    |                      | participants or assign interventions         |
| 36 |                    |                      |                                              |
| 37 |                    |                      |                                              |
| 38 |                    |                      |                                              |
| 39 |                    |                      |                                              |
| 40 |                    |                      |                                              |
| 41 | Allocation         | <a href="#">#16b</a> | Mechanism of implementing the 13             |
| 42 | concealment        |                      | allocation sequence (eg, central             |
| 43 | mechanism          |                      | telephone; sequentially numbered,            |
| 44 |                    |                      | opaque, sealed envelopes), describing        |
| 45 |                    |                      | any steps to conceal the sequence until      |
| 46 |                    |                      | interventions are assigned                   |
| 47 |                    |                      |                                              |
| 48 |                    |                      |                                              |
| 49 |                    |                      |                                              |
| 50 |                    |                      |                                              |
| 51 | Allocation:        | <a href="#">#16c</a> | Who will generate the allocation 9,13        |
| 52 | implementation     |                      | sequence, who will enrol participants,       |
| 53 |                    |                      | and who will assign participants to          |
| 54 |                    |                      | interventions                                |
| 55 |                    |                      |                                              |
| 56 |                    |                      |                                              |
| 57 |                    |                      |                                              |
| 58 | Blinding (masking) | <a href="#">#17a</a> | Who will be blinded after assignment to 13   |
| 59 |                    |                      |                                              |
| 60 |                    |                      |                                              |

interventions (eg, trial participants, care providers, outcome assessors, data analysts), and how

|    |                 |                                               |                                |
|----|-----------------|-----------------------------------------------|--------------------------------|
| 1  |                 |                                               |                                |
| 2  |                 |                                               |                                |
| 3  |                 |                                               |                                |
| 4  |                 |                                               |                                |
| 5  |                 |                                               |                                |
| 6  | Blinding        | <a href="#">#17b</a>                          |                                |
| 7  | (masking):      | If blinded, circumstances under which         | n/a – blinding is to biomarker |
| 8  | emergency       | unblinding is permissible, and procedure      | status not to treatment.       |
| 9  | unblinding      | for revealing a participant's allocated       |                                |
| 10 |                 | intervention during the trial                 |                                |
| 11 |                 |                                               |                                |
| 12 | Data collection | <a href="#">#18a</a>                          |                                |
| 13 | plan            | Plans for assessment and collection of        | 22                             |
| 14 |                 | outcome, baseline, and other trial data,      |                                |
| 15 |                 | including any related processes to            |                                |
| 16 |                 | promote data quality (eg, duplicate           |                                |
| 17 |                 | measurements, training of assessors)          |                                |
| 18 |                 | and a description of study instruments        |                                |
| 19 |                 | (eg, questionnaires, laboratory tests)        |                                |
| 20 |                 | along with their reliability and validity, if |                                |
| 21 |                 | known. Reference to where data                |                                |
| 22 |                 | collection forms can be found, if not in      |                                |
| 23 |                 | the protocol                                  |                                |
| 24 |                 |                                               |                                |
| 25 |                 |                                               |                                |
| 26 |                 |                                               |                                |
| 27 |                 |                                               |                                |
| 28 |                 |                                               |                                |
| 29 | Data collection | <a href="#">#18b</a>                          |                                |
| 30 | plan: retention | Plans to promote participant retention        | 22                             |
| 31 |                 | and complete follow-up, including list of     |                                |
| 32 |                 | any outcome data to be collected for          |                                |
| 33 |                 | participants who discontinue or deviate       |                                |
| 34 |                 | from intervention protocols                   |                                |
| 35 |                 |                                               |                                |
| 36 |                 |                                               |                                |
| 37 |                 |                                               |                                |
| 38 | Data management | <a href="#">#19</a>                           |                                |
| 39 |                 | Plans for data entry, coding, security,       | 22                             |
| 40 |                 | and storage, including any related            |                                |
| 41 |                 | processes to promote data quality (eg,        |                                |
| 42 |                 | double data entry; range checks for data      |                                |
| 43 |                 | values). Reference to where details of        |                                |
| 44 |                 | data management procedures can be             |                                |
| 45 |                 | found, if not in the protocol                 |                                |
| 46 |                 |                                               |                                |
| 47 |                 |                                               |                                |
| 48 |                 |                                               |                                |
| 49 | Statistics:     | <a href="#">#20a</a>                          |                                |
| 50 | outcomes        | Statistical methods for analysing primary     | 15, supp. Fig 1                |
| 51 |                 | and secondary outcomes. Reference to          |                                |
| 52 |                 | where other details of the statistical        |                                |
| 53 |                 | analysis plan can be found, if not in the     |                                |
| 54 |                 | protocol                                      |                                |
| 55 |                 |                                               |                                |
| 56 |                 |                                               |                                |
| 57 | Statistics:     | <a href="#">#20b</a>                          |                                |
| 58 |                 | Methods for any additional analyses (eg,      | 15-16, supp. Fig 1             |
| 59 |                 |                                               |                                |
| 60 |                 |                                               |                                |



|                                                                                  |                                                  |                                                                                                                                                                                                                                                                                                                                                            |                                                                                                                                                                                                                                             |
|----------------------------------------------------------------------------------|--------------------------------------------------|------------------------------------------------------------------------------------------------------------------------------------------------------------------------------------------------------------------------------------------------------------------------------------------------------------------------------------------------------------|---------------------------------------------------------------------------------------------------------------------------------------------------------------------------------------------------------------------------------------------|
| 1<br>2<br>3                                                                      | additional analyses                              | subgroup and adjusted analyses)                                                                                                                                                                                                                                                                                                                            |                                                                                                                                                                                                                                             |
| 4<br>5<br>6<br>7<br>8<br>9<br>10<br>11                                           | Statistics: analysis population and missing data | <a href="#">#20c</a> Definition of analysis population relating to protocol non-adherence (eg, as randomised analysis), and any statistical methods to handle missing data (eg, multiple imputation)                                                                                                                                                       | 15-16, supp. Fig 1                                                                                                                                                                                                                          |
| 12<br>13<br>14<br>15<br>16<br>17<br>18<br>19<br>20<br>21<br>22<br>23<br>24<br>25 | Data monitoring: formal committee                | <a href="#">#21a</a> Composition of data monitoring committee (DMC); summary of its role and reporting structure; statement of whether it is independent from the sponsor and competing interests; and reference to where further details about its charter can be found, if not in the protocol. Alternatively, an explanation of why a DMC is not needed | 22                                                                                                                                                                                                                                          |
| 26<br>27<br>28<br>29<br>30<br>31<br>32<br>33                                     | Data monitoring: interim analysis                | <a href="#">#21b</a> Description of any interim analyses and stopping guidelines, including who will have access to these interim results and make the final decision to terminate the trial                                                                                                                                                               | n/a – no interim analysis is planned.                                                                                                                                                                                                       |
| 34<br>35<br>36<br>37<br>38<br>39<br>40<br>41<br>42                               | Harms                                            | <a href="#">#22</a> Plans for collecting, assessing, reporting, and managing solicited and spontaneously reported adverse events and other unintended effects of trial interventions or trial conduct                                                                                                                                                      | 14                                                                                                                                                                                                                                          |
| 43<br>44<br>45<br>46<br>47<br>48<br>49<br>50<br>51<br>52<br>53<br>54<br>55<br>56 | Auditing                                         | <a href="#">#23</a> Frequency and procedures for auditing trial conduct, if any, and whether the process will be independent from investigators and the sponsor                                                                                                                                                                                            | n/a - a monitoring plan is currently in the process of being generated - detailing the frequency and scope of monitoring, including of trial conduct. All participating sites will be subject to routine trial specific on-site monitoring. |
| 57<br>58<br>59<br>60                                                             | Research ethics                                  | <a href="#">#24</a> Plans for seeking research ethics                                                                                                                                                                                                                                                                                                      | 10                                                                                                                                                                                                                                          |

|    |                       |                      |                                              |                             |
|----|-----------------------|----------------------|----------------------------------------------|-----------------------------|
| 1  | approval              |                      | committee / institutional review board       |                             |
| 2  |                       |                      | (REC / IRB) approval                         |                             |
| 3  |                       |                      |                                              |                             |
| 4  | Protocol              | <a href="#">#25</a>  | Plans for communicating important            | 7                           |
| 5  | amendments            |                      | protocol modifications (eg, changes to       |                             |
| 6  |                       |                      | eligibility criteria, outcomes, analyses) to |                             |
| 7  |                       |                      | relevant parties (eg, investigators, REC /   |                             |
| 8  |                       |                      | IRBs, trial participants, trial registries,  |                             |
| 9  |                       |                      | journals, regulators)                        |                             |
| 10 |                       |                      |                                              |                             |
| 11 |                       |                      |                                              |                             |
| 12 |                       |                      |                                              |                             |
| 13 |                       |                      |                                              |                             |
| 14 | Consent or assent     | <a href="#">#26a</a> | Who will obtain informed consent or          | 14                          |
| 15 |                       |                      | assent from potential trial participants or  |                             |
| 16 |                       |                      | authorised surrogates, and how (see          |                             |
| 17 |                       |                      | Item 32)                                     |                             |
| 18 |                       |                      |                                              |                             |
| 19 |                       |                      |                                              |                             |
| 20 |                       |                      |                                              |                             |
| 21 | Consent or            | <a href="#">#26b</a> | Additional consent provisions for            | n/a – no additional consent |
| 22 | assent: ancillary     |                      | collection and use of participant data and   | forms will be used.         |
| 23 | studies               |                      | biological specimens in ancillary studies,   |                             |
| 24 |                       |                      | if applicable                                |                             |
| 25 |                       |                      |                                              |                             |
| 26 |                       |                      |                                              |                             |
| 27 | Confidentiality       | <a href="#">#27</a>  | How personal information about potential     | 12-14                       |
| 28 |                       |                      | and enrolled participants will be            |                             |
| 29 |                       |                      | collected, shared, and maintained in         |                             |
| 30 |                       |                      | order to protect confidentiality before,     |                             |
| 31 |                       |                      | during, and after the trial                  |                             |
| 32 |                       |                      |                                              |                             |
| 33 |                       |                      |                                              |                             |
| 34 |                       |                      |                                              |                             |
| 35 |                       |                      |                                              |                             |
| 36 | Declaration of        | <a href="#">#28</a>  | Financial and other competing interests      | 23                          |
| 37 | interests             |                      | for principal investigators for the overall  |                             |
| 38 |                       |                      | trial and each study site                    |                             |
| 39 |                       |                      |                                              |                             |
| 40 |                       |                      |                                              |                             |
| 41 | Data access           | <a href="#">#29</a>  | Statement of who will have access to the     | 17                          |
| 42 |                       |                      | final trial dataset, and disclosure of       |                             |
| 43 |                       |                      | contractual agreements that limit such       |                             |
| 44 |                       |                      | access for investigators                     |                             |
| 45 |                       |                      |                                              |                             |
| 46 |                       |                      |                                              |                             |
| 47 |                       |                      |                                              |                             |
| 48 | Ancillary and post    | <a href="#">#30</a>  | Provisions, if any, for ancillary and post-  | 14                          |
| 49 | trial care            |                      | trial care, and for compensation to those    |                             |
| 50 |                       |                      | who suffer harm from trial participation     |                             |
| 51 |                       |                      |                                              |                             |
| 52 |                       |                      |                                              |                             |
| 53 | Dissemination         | <a href="#">#31a</a> | Plans for investigators and sponsor to       | 10                          |
| 54 | policy: trial results |                      | communicate trial results to participants,   |                             |
| 55 |                       |                      | healthcare professionals, the public, and    |                             |
| 56 |                       |                      | other relevant groups (eg, via publication,  |                             |
| 57 |                       |                      |                                              |                             |
| 58 |                       |                      |                                              |                             |
| 59 |                       |                      |                                              |                             |
| 60 |                       |                      |                                              |                             |

reporting in results databases, or other data sharing arrangements), including any publication restrictions

|    |                    |                      |                                              |
|----|--------------------|----------------------|----------------------------------------------|
| 1  |                    |                      |                                              |
| 2  |                    |                      |                                              |
| 3  |                    |                      |                                              |
| 4  |                    |                      |                                              |
| 5  | Dissemination      | <a href="#">#31b</a> | Authorship eligibility guidelines and any    |
| 6  | policy: authorship |                      | intended use of professional writers         |
| 7  |                    |                      | 17                                           |
| 8  |                    |                      |                                              |
| 9  | Dissemination      | <a href="#">#31c</a> | Plans, if any, for granting public access    |
| 10 | policy:            |                      | to the full protocol, participant-level      |
| 11 | reproducible       |                      | dataset, and statistical code                |
| 12 | research           |                      | 7 – website link to the full trial           |
| 13 |                    |                      | protocol.                                    |
| 14 |                    |                      |                                              |
| 15 |                    |                      |                                              |
| 16 | Informed consent   | <a href="#">#32</a>  | Model consent form and other related         |
| 17 | materials          |                      | documentation given to participants and      |
| 18 |                    |                      | authorised surrogates                        |
| 19 |                    |                      | 7 – website link to full                     |
| 20 |                    |                      | participant information sheet                |
| 21 |                    |                      | and consent form.                            |
| 22 | Biological         | <a href="#">#33</a>  | Plans for collection, laboratory             |
| 23 | specimens          |                      | evaluation, and storage of biological        |
| 24 |                    |                      | specimens for genetic or molecular           |
| 25 |                    |                      | analysis in the current trial and for future |
| 26 |                    |                      | use in ancillary studies, if applicable      |
| 27 |                    |                      |                                              |
| 28 |                    |                      |                                              |
| 29 |                    |                      |                                              |

30 The SPIRIT checklist is distributed under the terms of the Creative Commons Attribution License CC-  
 31 BY-ND 3.0. This checklist can be completed online using <https://www.goodreports.org/>, a tool made  
 32 by the [EQUATOR Network](#) in collaboration with [Penelope.ai](#)  
 33
