# Supplementary material for: PRedicting Outcomes For Crohn’s dIsease using a moLecular biomarkEr (PROFILE): protocol for a multicentre, randomised, biomarker-stratified trial
Source: PubMed Central journal article supplement (PMC6286485; doi:10.1136/bmjopen-2018-026767), 2018-12-05
Supplement: bmjopen-2018-026767.reviewer_comments.pdf [file bmjopen-2018-026767.reviewer_comments.pdf]

## PEER REVIEW HISTORY

BMJ Open publishes all reviews undertaken for accepted manuscripts. Reviewers are asked to complete a checklist review form (<http://bmjopen.bmj.com/site/about/resources/checklist.pdf>) and are provided with free text boxes to elaborate on their assessment. These free text comments are reproduced below.

## ARTICLE DETAILS

|                            |                                                                                                                                                                                                  |
|----------------------------|--------------------------------------------------------------------------------------------------------------------------------------------------------------------------------------------------|
| <b>TITLE (PROVISIONAL)</b> | Predicting outcomes for Crohn's disease using a molecular biomarker (PROFILE): protocol for a multi-centre, randomised, biomarker-stratified trial                                               |
| <b>AUTHORS</b>             | Parkes, M; Noor, Nurulamin; Dowling, Francis; Leung, Harvey; Bond, Simon; Whitehead, Lynne; Upponi, Sara; Kinnon, Paul; Sandham, Andrew; Lyons, Paul; McKinney, Eoin; Smith, Kenneth; Lee, James |

This article was not externally reviewed at BMJ Open. Protocols that have been independently assessed prior to submission to BMJ Open are usually fast-tracked to publication on the grounds that further substantial changes will not be possible. This independent assessment will usually be external, independent review for both a substantial grant award from a non-commercial or government funder and ethics approval.
